# Supplementary material for: Differential DNA methylation in high-grade serous ovarian cancer (HGSOC) is associated with tumor behavior
Source: PubMed Central journal article supplement (PMC6884482; doi:10.1038/s41598-019-54401-w), 2019-11-29
Supplement: 41598_2019_54401_MOESM1_ESM.pdf [file 41598_2019_54401_MOESM1_ESM.pdf]

**Differential DNA methylation in high-grade serous ovarian cancer (HGSOC)  
is associated with tumor behavior**

**Henry D. Reyes, Eric J. Devor, Akshaya Warriar, Andreea M. Newton,  
Jordan Mattson, Vincent Wagner, Gabrielle N. Duncan, Kimberly K. Leslie,  
Jesus Gonzalez-Bosquet**

**Supplemental Table 1: Long-range "open seas" with significant differential  
methylation signatures. Negative methylation values represent hypo-  
methylation in HGSOC compared with fallopian tube controls.  
Chromosome coordinates are GRCh38 numbers.**

| <b>Chromos</b> | <b>Start</b> | <b>End</b> | <b>Length (kb)</b> | <b>value</b> | <b>p-value</b> |
|----------------|--------------|------------|--------------------|--------------|----------------|
| 1              | 4886129      | 5295746    | 409.6              | -0.17369     | 2.73E-05       |
| 1              | 71809745     | 72190606   | 380.9              | -0.15652     | 3.00E-04       |
| 1              | 96144934     | 96629912   | 485.0              | -0.14793     | 7.64E-04       |
| 1              | 158217942    | 158944784  | 726.8              | -0.18        | 1.00E-08       |
| 1              | 159165562    | 159697240  | 531.7              | -0.14994     | 2.73E-04       |
| 1              | 187343088    | 187840215  | 497.1              | -0.17138     | 2.73E-05       |
| 1              | 240874827    | 241639410  | 764.6              | -0.14343     | 4.09E-04       |
| 1              | 242187498    | 243100073  | 912.6              | -0.18989     | 1.00E-08       |
| 1              | 243706206    | 244192443  | 486.2              | -0.13064     | 9.83E-04       |
| 1              | 248159309    | 248907659  | 748.4              | -0.14991     | 2.73E-05       |
| 2              | 1878311      | 2769039    | 890.7              | -0.14173     | 8.19E-05       |
| 2              | 3786250      | 4306408    | 520.2              | -0.14081     | 9.55E-04       |
| 2              | 13623703     | 15012948.5 | 1389.2             | -0.16228     | 1.09E-04       |
| 2              | 21442643     | 22147895   | 705.3              | -0.14921     | 3.00E-04       |
| 2              | 49980786     | 51013681   | 1032.9             | -0.1362      | 7.91E-04       |
| 2              | 56968218     | 57771498   | 803.3              | -0.15267     | 5.19E-04       |
| 2              | 66666971     | 67041254   | 374.3              | 0.15796      | 1.36E-04       |
| 2              | 116098870    | 116852238  | 753.4              | -0.16414     | 1.36E-04       |
| 2              | 125195905    | 127315703  | 2119.8             | -0.15826     | 5.46E-05       |
| 2              | 137516183    | 138045743  | 529.6              | -0.15797     | 2.18E-04       |
| 2              | 199431605    | 200245170  | 813.6              | -0.14346     | 7.10E-04       |
| 2              | 228855878    | 230179047  | 1323.2             | -0.15675     | 5.46E-05       |
| 3              | 5796595      | 6832844    | 1036.2             | -0.15979     | 1.64E-04       |
| 3              | 76292114     | 76645048   | 352.9              | -0.15053     | 6.00E-04       |
| 3              | 84158113     | 85410842   | 1252.7             | -0.14508     | 5.46E-04       |
| 3              | 115919469    | 116535204  | 615.7              | -0.14228     | 7.91E-04       |
| 3              | 161884911    | 162135697  | 250.8              | -0.15607     | 5.46E-04       |
| 3              | 179672470    | 180297596  | 625.1              | -0.15416     | 1.91E-04       |
| 4              | 9336287.5    | 9371217.5  | 34.9               | -0.16897     | 2.73E-04       |
| 4              | 11967137     | 12314075   | 346.9              | -0.15494     | 3.00E-04       |
| 4              | 13767630     | 14390632   | 623.0              | -0.13634     | 6.28E-04       |
| 4              | 29710263     | 29751733   | 41.5               | -0.18738     | 5.46E-05       |
| 4              | 36641040     | 37020018   | 379.0              | -0.15596     | 3.28E-04       |

|   |            |            |        |          |          |
|---|------------|------------|--------|----------|----------|
| 4 | 45946199   | 46650206   | 704.0  | -0.1708  | 5.46E-05 |
| 5 | 1892110    | 5166199.5  | 3274.1 | -0.16634 | 1.00E-08 |
| 5 | 5535886    | 6544833    | 1008.9 | -0.15193 | 2.73E-05 |
| 5 | 7364007    | 7794275    | 430.3  | -0.15961 | 1.64E-04 |
| 5 | 11774991   | 11931819   | 156.8  | -0.17314 | 8.19E-05 |
| 5 | 113588550  | 114026851  | 438.3  | -0.15341 | 2.73E-04 |
| 5 | 152234077  | 152591026  | 356.9  | -0.18674 | 1.00E-08 |
| 5 | 152805675  | 153285036  | 479.4  | -0.1667  | 2.73E-05 |
| 5 | 161855622  | 162051083  | 195.5  | -0.20147 | 1.00E-08 |
| 5 | 163060530  | 167396870  | 4336.3 | -0.15634 | 1.00E-08 |
| 6 | 47778694   | 48971322   | 1192.6 | -0.15637 | 1.64E-04 |
| 6 | 76782041   | 77325193   | 543.2  | -0.15087 | 4.91E-04 |
| 6 | 123343266  | 123597874  | 254.6  | -0.15867 | 3.82E-04 |
| 6 | 165821961  | 166417490  | 595.5  | -0.14501 | 1.09E-04 |
| 7 | 14165745   | 14353119.5 | 187.4  | -0.16919 | 1.64E-04 |
| 7 | 31827390   | 32315577   | 488.2  | -0.14045 | 6.00E-04 |
| 7 | 108486939  | 109096260  | 609.3  | -0.15582 | 4.91E-04 |
| 7 | 113517552  | 113952882  | 435.3  | -0.1694  | 5.46E-05 |
| 7 | 118372311  | 118498886  | 126.6  | -0.1577  | 8.46E-04 |
| 7 | 119112663  | 119260946  | 148.3  | -0.17894 | 1.00E-08 |
| 7 | 125942245  | 126496590  | 554.3  | -0.14461 | 9.01E-04 |
| 7 | 126675358  | 126884639  | 209.3  | -0.15338 | 4.09E-04 |
| 7 | 140739534  | 141190187  | 450.7  | -0.13886 | 7.64E-04 |
| 7 | 141564636  | 141999418  | 434.8  | -0.13193 | 9.28E-04 |
| 7 | 144604903  | 145450472  | 845.6  | -0.19147 | 1.00E-08 |
| 7 | 145945578  | 146130429  | 184.9  | -0.17066 | 3.00E-04 |
| 7 | 146720272  | 147849501  | 1129.2 | -0.14559 | 4.37E-04 |
| 7 | 153754822  | 154651619  | 896.8  | -0.13565 | 4.09E-04 |
| 7 | 157255232  | 158336690  | 1081.5 | -0.17184 | 1.00E-08 |
| 8 | 798432     | 1645045    | 846.6  | -0.14425 | 1.00E-08 |
| 8 | 2009485    | 3102057.5  | 1092.6 | -0.14679 | 2.73E-05 |
| 8 | 3233045    | 4329150    | 1096.1 | -0.14812 | 3.00E-04 |
| 8 | 4504923.5  | 5028854    | 523.9  | -0.1686  | 2.73E-05 |
| 8 | 5367248    | 6038136    | 670.9  | -0.14892 | 4.91E-04 |
| 8 | 13707000.5 | 14018761   | 311.8  | -0.17637 | 2.73E-05 |
| 8 | 34280422   | 36235724   | 1955.3 | -0.18573 | 1.00E-08 |
| 8 | 49846578   | 51364244   | 1517.7 | -0.15493 | 2.73E-05 |
| 8 | 51926793   | 52365888   | 439.1  | -0.16899 | 5.46E-05 |
| 8 | 62788052   | 63147364   | 359.3  | -0.14736 | 7.10E-04 |
| 8 | 65462682   | 66131741   | 669.1  | -0.16769 | 2.73E-05 |
| 8 | 76227159   | 76560371   | 333.2  | -0.14892 | 8.46E-04 |
| 8 | 85560350   | 85832904   | 272.6  | -0.17024 | 5.46E-05 |
| 8 | 109009486  | 109145172  | 135.7  | -0.15895 | 3.00E-04 |
| 8 | 111620462  | 111719992  | 99.5   | -0.1793  | 1.09E-04 |
| 8 | 113475312  | 114115265  | 640.0  | -0.15118 | 4.64E-04 |
| 8 | 131761856  | 132594841  | 833.0  | -0.14695 | 4.64E-04 |
| 8 | 135935344  | 136409523  | 474.2  | -0.16822 | 5.46E-05 |

|    |            |            |        |          |          |
|----|------------|------------|--------|----------|----------|
| 8  | 137619505  | 138231660  | 612.2  | -0.17272 | 1.00E-08 |
| 8  | 138738134  | 139165566  | 427.4  | -0.19621 | 1.00E-08 |
| 8  | 140035732  | 140659783  | 624.1  | -0.15259 | 2.18E-04 |
| 9  | 10366759   | 10633641   | 266.9  | -0.18758 | 1.00E-08 |
| 9  | 23672559.5 | 24920862   | 1248.3 | -0.16181 | 1.36E-04 |
| 9  | 25261450   | 26502756   | 1241.3 | -0.15482 | 2.73E-04 |
| 9  | 104473642  | 104757854  | 284.2  | -0.18912 | 1.00E-08 |
| 9  | 119691550  | 120210352  | 518.8  | -0.18058 | 1.00E-08 |
| 9  | 121181018  | 121505108  | 324.1  | -0.17697 | 2.73E-05 |
| 10 | 1547721    | 3015699.5  | 1468.0 | -0.16063 | 1.00E-08 |
| 10 | 7049378    | 7477590    | 428.2  | -0.14354 | 2.73E-04 |
| 10 | 9999498    | 11272899   | 1273.4 | -0.13016 | 1.64E-04 |
| 10 | 16032954   | 16441897   | 408.9  | -0.18741 | 1.00E-08 |
| 10 | 18124504   | 18385632   | 261.1  | -0.15176 | 4.37E-04 |
| 10 | 106232717  | 107597533  | 1364.8 | -0.15466 | 1.36E-04 |
| 10 | 107935977  | 108342212  | 406.2  | -0.14773 | 6.28E-04 |
| 10 | 108855141  | 110214215  | 1359.1 | -0.14949 | 3.00E-04 |
| 10 | 110303937  | 110701934  | 398.0  | -0.16375 | 1.36E-04 |
| 10 | 130040865  | 130659198  | 618.3  | -0.14728 | 1.36E-04 |
| 10 | 132177258  | 133648934  | 1471.7 | -0.14374 | 1.00E-08 |
| 11 | 4713544    | 5552785    | 839.2  | -0.1668  | 1.00E-08 |
| 11 | 24436937   | 24849257   | 412.3  | -0.15912 | 3.00E-04 |
| 11 | 42862161   | 43168034   | 305.9  | -0.17017 | 5.46E-05 |
| 11 | 55338135   | 56587403.5 | 1249.3 | -0.17735 | 1.00E-08 |
| 11 | 57881602   | 58192062   | 310.5  | -0.1473  | 5.46E-04 |
| 11 | 59659419   | 60296549   | 637.1  | -0.16174 | 1.00E-08 |
| 11 | 83153008   | 83436492.5 | 283.5  | -0.14166 | 7.37E-04 |
| 11 | 87224821   | 87434057   | 209.2  | -0.15126 | 9.55E-04 |
| 11 | 131533252  | 132891713  | 1358.5 | -0.18474 | 1.00E-08 |
| 12 | 61899255   | 62512367   | 613.1  | -0.14714 | 7.10E-04 |
| 12 | 103437918  | 103787156  | 349.2  | -0.1613  | 1.91E-04 |
| 12 | 115468491  | 116291234  | 822.7  | -0.12532 | 7.64E-04 |
| 12 | 118955657  | 119347187  | 391.5  | -0.15951 | 1.64E-04 |
| 12 | 126520740  | 127483006  | 962.3  | -0.13385 | 4.37E-04 |
| 12 | 129415102  | 130446362  | 1031.3 | -0.15264 | 2.73E-05 |
| 13 | 26051676   | 26564488   | 512.8  | -0.14441 | 3.82E-04 |
| 13 | 56511952   | 57133493   | 621.5  | -0.1643  | 1.36E-04 |
| 13 | 61455634   | 61660030   | 204.4  | -0.16523 | 2.46E-04 |
| 13 | 107910972  | 108657826  | 746.9  | -0.1695  | 1.00E-08 |
| 13 | 109071839  | 109387041  | 315.2  | -0.15279 | 4.09E-04 |
| 13 | 112082093  | 113088886  | 1006.8 | -0.16896 | 1.00E-08 |
| 14 | 27545522   | 27836139   | 290.6  | -0.16088 | 8.19E-04 |
| 14 | 87716101   | 87897658   | 181.6  | -0.17004 | 5.46E-05 |
| 15 | 26447291   | 27035142.5 | 587.9  | -0.15985 | 1.64E-04 |
| 15 | 37697375   | 37974776   | 277.4  | -0.16233 | 7.64E-04 |
| 15 | 53252822   | 53485623   | 232.8  | -0.1638  | 2.18E-04 |
| 16 | 5373567    | 6661697    | 1288.1 | -0.15149 | 5.46E-05 |

|    |            |           |        |          |          |
|----|------------|-----------|--------|----------|----------|
| 16 | 17054840   | 17685871  | 631.0  | -0.135   | 1.36E-04 |
| 16 | 17834936   | 18246884  | 411.9  | -0.15105 | 2.46E-04 |
| 16 | 25586856   | 25851007  | 264.2  | -0.15396 | 4.09E-04 |
| 16 | 48865450   | 49204333  | 338.9  | -0.14865 | 4.91E-04 |
| 16 | 60448068   | 61084547  | 636.5  | -0.1503  | 9.83E-04 |
| 16 | 76296523   | 77044480  | 748.0  | -0.15017 | 2.46E-04 |
| 16 | 82314773   | 83803650  | 1488.9 | -0.16801 | 1.00E-08 |
| 17 | 49513053.5 | 51063065  | 1550.0 | -0.15369 | 1.00E-08 |
| 18 | 4106506    | 4599319   | 492.8  | -0.18323 | 1.00E-08 |
| 18 | 4756135    | 5232798   | 476.7  | -0.16391 | 1.36E-04 |
| 18 | 5393019    | 5747675.5 | 354.7  | -0.15721 | 2.18E-04 |
| 18 | 66504307.5 | 67432783  | 928.5  | -0.15701 | 5.46E-05 |
| 18 | 68664091   | 69065767  | 401.7  | -0.14733 | 9.55E-04 |
| 18 | 70339257   | 71563310  | 1224.1 | -0.14599 | 1.64E-04 |
| 18 | 75010803   | 76760253  | 1749.5 | -0.18836 | 1.00E-08 |
| 19 | 30596691.5 | 31155284  | 558.6  | -0.14118 | 5.19E-04 |
| 19 | 31939554   | 32403368  | 463.8  | -0.15777 | 3.00E-04 |
| 19 | 54989027   | 55283829  | 294.8  | -0.12741 | 9.01E-04 |
| 19 | 56288909.5 | 56549544  | 260.6  | -0.14977 | 5.73E-04 |
| 20 | 6246047    | 7373216   | 1127.2 | -0.15755 | 2.73E-05 |
| 20 | 40490942   | 41319967  | 829.0  | -0.15524 | 1.64E-04 |
| 20 | 41574350   | 41952073  | 377.7  | -0.16917 | 5.46E-05 |
| 20 | 58755997   | 60489355  | 1733.4 | -0.2065  | 1.00E-08 |
| 21 | 22696706   | 23493155  | 796.4  | -0.15524 | 2.18E-04 |
| 21 | 31579225   | 32334697  | 755.5  | -0.16687 | 1.00E-08 |
| 21 | 41706246   | 42259157  | 552.9  | -0.15551 | 1.64E-04 |
| X  | 86919857   | 86919857  | 0.0    | 1.01752  | 6.28E-04 |

**Supplemental Table 2: Short-range "shores" with significant differential methylation signatures. Positive methylation values indicate hypermethylation in HGSOC compared with fallopian tube controls and negative methylation values indicate hypomethylation in HGSOC compared with fallopian tube controls.**

**Chromosome coordinates are GRCh38 numbers.**

| Chrom | start   | end     | Length (kb) | value    | p-value |
|-------|---------|---------|-------------|----------|---------|
| chr1  | 1297567 | 1297576 | 0.01        | 0.32022  | 0       |
| chr1  | 1566351 | 1566699 | 0.35        | 0.29097  | 0       |
| chr1  | 2006032 | 2006139 | 0.11        | 0.31908  | 0       |
| chr1  | 2205770 | 2205902 | 0.13        | 0.34635  | 0       |
| chr1  | 2425860 | 2425952 | 0.09        | -0.30717 | 0       |
| chr1  | 2918724 | 2918752 | 0.03        | -0.32131 | 0       |
| chr1  | 3147622 | 3147966 | 0.34        | -0.39671 | 0       |
| chr1  | 3809431 | 3809532 | 0.1         | 0.32626  | 0       |
| chr1  | 4221401 | 4221485 | 0.08        | -0.29494 | 0.00064 |
| chr1  | 4663943 | 4664431 | 0.49        | -0.28549 | 0.00042 |

|      |           |           |      |          |         |
|------|-----------|-----------|------|----------|---------|
| chr1 | 5062141   | 5062216   | 0.08 | -0.34356 | 0       |
| chr1 | 6336519   | 6336743   | 0.22 | 0.31057  | 0       |
| chr1 | 7913067   | 7913579   | 0.51 | 0.36023  | 0       |
| chr1 | 8271918   | 8272081   | 0.16 | -0.30581 | 0       |
| chr1 | 8651018   | 8651231   | 0.21 | 0.29325  | 0.00085 |
| chr1 | 10292174  | 10292195  | 0.02 | 0.3386   | 0       |
| chr1 | 12164457  | 12164477  | 0.02 | 0.32587  | 0       |
| chr1 | 12493605  | 12493840  | 0.24 | 0.30816  | 0       |
| chr1 | 16847157  | 16847214  | 0.06 | 0.32108  | 0       |
| chr1 | 18686618  | 18687127  | 0.51 | -0.29188 | 0       |
| chr1 | 22416016  | 22416488  | 0.47 | 0.30685  | 0       |
| chr1 | 24152579  | 24152774  | 0.2  | -0.32512 | 0       |
| chr1 | 24648203  | 24648328  | 0.13 | -0.32297 | 0       |
| chr1 | 25254129  | 25254149  | 0.02 | 0.29857  | 0.00021 |
| chr1 | 25893405  | 25893744  | 0.34 | 0.29929  | 0       |
| chr1 | 27189985  | 27190330  | 0.35 | -0.30116 | 0       |
| chr1 | 28843701  | 28843736  | 0.04 | -0.31924 | 0       |
| chr1 | 33231178  | 33231190  | 0.01 | 0.30303  | 0.00021 |
| chr1 | 33803805  | 33804213  | 0.41 | 0.32852  | 0       |
| chr1 | 34175120  | 34175317  | 0.2  | -0.2825  | 0.00021 |
| chr1 | 38481765  | 38482118  | 0.35 | 0.34725  | 0       |
| chr1 | 39724134  | 39724195  | 0.06 | 0.30285  | 0.00021 |
| chr1 | 41454155  | 41454277  | 0.12 | 0.307    | 0       |
| chr1 | 43609431  | 43609461  | 0.03 | 0.33949  | 0       |
| chr1 | 47694919  | 47695138  | 0.22 | 0.33601  | 0       |
| chr1 | 47698493  | 47698976  | 0.48 | 0.29322  | 0       |
| chr1 | 55013735  | 55013956  | 0.22 | 0.31     | 0       |
| chr1 | 55794598  | 55794878  | 0.28 | 0.32516  | 0       |
| chr1 | 56975583  | 56975689  | 0.11 | 0.3221   | 0       |
| chr1 | 59484600  | 59484803  | 0.2  | 0.28444  | 0.00042 |
| chr1 | 61586157  | 61586195  | 0.04 | 0.32404  | 0       |
| chr1 | 62438955  | 62439021  | 0.07 | 0.34074  | 0       |
| chr1 | 62660435  | 62660624  | 0.19 | 0.35497  | 0       |
| chr1 | 62660850  | 62660861  | 0.01 | 0.32059  | 0       |
| chr1 | 72382645  | 72382835  | 0.19 | -0.312   | 0       |
| chr1 | 84629943  | 84630050  | 0.11 | 0.29557  | 0       |
| chr1 | 89357945  | 89357988  | 0.04 | -0.31288 | 0       |
| chr1 | 91185233  | 91185422  | 0.19 | 0.29777  | 0.00021 |
| chr1 | 91185749  | 91185922  | 0.17 | 0.31264  | 0       |
| chr1 | 91188999  | 91189167  | 0.17 | 0.29898  | 0.00021 |
| chr1 | 91300288  | 91300390  | 0.1  | 0.27801  | 0.00042 |
| chr1 | 94079684  | 94079866  | 0.18 | 0.33061  | 0       |
| chr1 | 95123877  | 95124061  | 0.18 | 0.3613   | 0       |
| chr1 | 95507935  | 95508282  | 0.35 | 0.30632  | 0       |
| chr1 | 109506658 | 109506696 | 0.04 | -0.30326 | 0.00021 |
| chr1 | 110254828 | 110254835 | 0.01 | 0.34857  | 0       |
| chr1 | 111970925 | 111971020 | 0.1  | 0.28661  | 0.00021 |

|      |           |           |      |          |         |
|------|-----------|-----------|------|----------|---------|
| chr1 | 114489550 | 114489995 | 0.45 | 0.34261  | 0       |
| chr1 | 114842021 | 114842468 | 0.45 | 0.31408  | 0       |
| chr1 | 116925194 | 116925753 | 0.56 | 0.34336  | 0       |
| chr1 | 118389869 | 118390138 | 0.27 | 0.39743  | 0       |
| chr1 | 119526060 | 119526255 | 0.2  | 0.39131  | 0       |
| chr1 | 147781212 | 147781600 | 0.39 | 0.33669  | 0       |
| chr1 | 147781827 | 147782558 | 0.73 | 0.33182  | 0       |
| chr1 | 147790458 | 147790806 | 0.35 | 0.32381  | 0       |
| chr1 | 150448887 | 150448943 | 0.06 | 0.3846   | 0       |
| chr1 | 150779369 | 150780019 | 0.65 | 0.34382  | 0       |
| chr1 | 150780684 | 150781434 | 0.75 | 0.35407  | 0       |
| chr1 | 152197889 | 152198107 | 0.22 | -0.3022  | 0.00021 |
| chr1 | 153363020 | 153363264 | 0.24 | -0.29353 | 0.00064 |
| chr1 | 153724779 | 153725318 | 0.54 | 0.37302  | 0       |
| chr1 | 154407010 | 154407027 | 0.02 | 0.30199  | 0.00021 |
| chr1 | 154407366 | 154407478 | 0.11 | 0.45912  | 0       |
| chr1 | 154929455 | 154929657 | 0.2  | 0.31216  | 0       |
| chr1 | 154942566 | 154942910 | 0.34 | 0.32446  | 0       |
| chr1 | 155188904 | 155188982 | 0.08 | 0.30195  | 0.00021 |
| chr1 | 158549277 | 158549410 | 0.13 | -0.33434 | 0       |
| chr1 | 158564533 | 158564883 | 0.35 | -0.32509 | 0       |
| chr1 | 158604822 | 158605757 | 0.94 | -0.31217 | 0       |
| chr1 | 158656484 | 158656718 | 0.23 | -0.31761 | 0       |
| chr1 | 158670617 | 158670761 | 0.14 | -0.3046  | 0.00021 |
| chr1 | 159283536 | 159284298 | 0.76 | -0.27318 | 0.00021 |
| chr1 | 160992119 | 160992358 | 0.24 | -0.27239 | 0.00085 |
| chr1 | 162518082 | 162518158 | 0.08 | 0.3234   | 0       |
| chr1 | 162601805 | 162601807 | 0    | 0.32481  | 0       |
| chr1 | 164544496 | 164544748 | 0.25 | 0.30837  | 0       |
| chr1 | 164545553 | 164545783 | 0.23 | 0.3183   | 0       |
| chr1 | 164595186 | 164595269 | 0.08 | 0.27618  | 0.00042 |
| chr1 | 164681588 | 164681652 | 0.06 | 0.29038  | 0       |
| chr1 | 164744047 | 164744436 | 0.39 | 0.31138  | 0       |
| chr1 | 165631596 | 165631946 | 0.35 | 0.30701  | 0       |
| chr1 | 166459325 | 166459524 | 0.2  | -0.31631 | 0       |
| chr1 | 167397535 | 167397908 | 0.37 | 0.32524  | 0       |
| chr1 | 170638807 | 170639289 | 0.48 | 0.34447  | 0       |
| chr1 | 171226993 | 171227124 | 0.13 | 0.28012  | 0.00042 |
| chr1 | 172113506 | 172114857 | 1.35 | 0.32762  | 0       |
| chr1 | 174968015 | 174968144 | 0.13 | 0.32611  | 0       |
| chr1 | 181767736 | 181767774 | 0.04 | -0.31465 | 0       |
| chr1 | 183107083 | 183107206 | 0.12 | 0.30893  | 0       |
| chr1 | 187610300 | 187610488 | 0.19 | -0.29049 | 0       |
| chr1 | 201465777 | 201465789 | 0.01 | 0.35318  | 0       |
| chr1 | 201982886 | 201982957 | 0.07 | -0.32529 | 0       |
| chr1 | 202379967 | 202379988 | 0.02 | 0.36693  | 0       |
| chr1 | 208012106 | 208012118 | 0.01 | 0.29498  | 0.00064 |

|      |           |           |      |          |         |
|------|-----------|-----------|------|----------|---------|
| chr1 | 210468441 | 210468650 | 0.21 | 0.3201   | 0       |
| chr1 | 210501621 | 210501634 | 0.01 | 0.29686  | 0.00042 |
| chr1 | 212457424 | 212457538 | 0.11 | -0.3545  | 0       |
| chr1 | 215178601 | 215178658 | 0.06 | 0.33375  | 0       |
| chr1 | 221054365 | 221054430 | 0.07 | 0.27638  | 0.00042 |
| chr1 | 221055097 | 221055665 | 0.57 | 0.32873  | 0       |
| chr1 | 221068423 | 221069136 | 0.71 | 0.33552  | 0       |
| chr1 | 225767995 | 225768233 | 0.24 | 0.332    | 0       |
| chr1 | 225768784 | 225769034 | 0.25 | 0.45597  | 0       |
| chr1 | 226099128 | 226099147 | 0.02 | 0.31575  | 0       |
| chr1 | 226862907 | 226862915 | 0.01 | 0.30087  | 0.00021 |
| chr1 | 227962723 | 227963171 | 0.45 | 0.3069   | 0       |
| chr1 | 234667230 | 234667363 | 0.13 | 0.3372   | 0       |
| chr1 | 234908226 | 234908381 | 0.16 | -0.30491 | 0.00021 |
| chr1 | 242351909 | 242352195 | 0.29 | -0.36608 | 0       |
| chr1 | 242767727 | 242767942 | 0.22 | -0.38332 | 0       |
| chr1 | 245499492 | 245499541 | 0.05 | -0.35732 | 0       |
| chr1 | 246743272 | 246743403 | 0.13 | 0.35456  | 0       |
| chr1 | 247511364 | 247511469 | 0.11 | 0.31622  | 0       |
| chr1 | 248902767 | 248903100 | 0.33 | -0.32718 | 0       |
| chr2 | 468413    | 468989    | 0.58 | 0.30625  | 0       |
| chr2 | 875509    | 875990    | 0.48 | -0.28485 | 0.00042 |
| chr2 | 1926535   | 1926724   | 0.19 | -0.35228 | 0       |
| chr2 | 2030359   | 2030712   | 0.35 | -0.3011  | 0.00021 |
| chr2 | 2193511   | 2193537   | 0.03 | -0.35773 | 0       |
| chr2 | 2321772   | 2321788   | 0.02 | -0.3553  | 0       |
| chr2 | 2334766   | 2334985   | 0.22 | -0.29272 | 0.00085 |
| chr2 | 2402353   | 2402636   | 0.28 | -0.2948  | 0.00064 |
| chr2 | 2692854   | 2692889   | 0.04 | -0.37251 | 0       |
| chr2 | 3633407   | 3633519   | 0.11 | 0.37131  | 0       |
| chr2 | 3646077   | 3646196   | 0.12 | -0.31377 | 0       |
| chr2 | 3826621   | 3826631   | 0.01 | -0.31272 | 0       |
| chr2 | 4050695   | 4050845   | 0.15 | -0.36021 | 0       |
| chr2 | 8978201   | 8978225   | 0.02 | -0.39509 | 0       |
| chr2 | 9526703   | 9527051   | 0.35 | -0.39274 | 0       |
| chr2 | 10266949  | 10266986  | 0.04 | 0.46046  | 0       |
| chr2 | 11606881  | 11607106  | 0.23 | -0.33448 | 0       |
| chr2 | 12443300  | 12443780  | 0.48 | -0.31545 | 0       |
| chr2 | 16804409  | 16804452  | 0.04 | -0.42433 | 0       |
| chr2 | 20650578  | 20650792  | 0.21 | 0.28655  | 0.00021 |
| chr2 | 21618087  | 21618766  | 0.68 | -0.27298 | 0.00085 |
| chr2 | 23840537  | 23840739  | 0.2  | 0.2804   | 0.00042 |
| chr2 | 27301195  | 27301369  | 0.17 | 0.27867  | 0.00042 |
| chr2 | 27301490  | 27301651  | 0.16 | 0.3036   | 0       |
| chr2 | 28182529  | 28182570  | 0.04 | 0.40105  | 0       |
| chr2 | 28491946  | 28492416  | 0.47 | 0.32055  | 0       |
| chr2 | 28857916  | 28858407  | 0.49 | 0.41874  | 0       |

|      |           |           |      |          |         |
|------|-----------|-----------|------|----------|---------|
| chr2 | 38300537  | 38300707  | 0.17 | 0.28747  | 0.00021 |
| chr2 | 38334178  | 38334245  | 0.07 | 0.29354  | 0.00064 |
| chr2 | 38947733  | 38947762  | 0.03 | 0.32598  | 0       |
| chr2 | 39621470  | 39621862  | 0.39 | 0.3056   | 0       |
| chr2 | 40447561  | 40447599  | 0.04 | 0.29537  | 0.00064 |
| chr2 | 40739515  | 40739771  | 0.26 | 0.30785  | 0       |
| chr2 | 42175341  | 42175351  | 0.01 | 0.33511  | 0       |
| chr2 | 45028225  | 45028269  | 0.04 | 0.29144  | 0       |
| chr2 | 45159434  | 45159504  | 0.07 | 0.29735  | 0       |
| chr2 | 45159663  | 45160490  | 0.83 | 0.29869  | 0       |
| chr2 | 45395194  | 45395252  | 0.06 | 0.37989  | 0       |
| chr2 | 45998165  | 45998548  | 0.38 | 0.29172  | 0.00085 |
| chr2 | 46747628  | 46747951  | 0.32 | 0.30255  | 0.00021 |
| chr2 | 46997959  | 46998070  | 0.11 | 0.34226  | 0       |
| chr2 | 48737157  | 48737604  | 0.45 | 0.33037  | 0       |
| chr2 | 55203963  | 55204245  | 0.28 | 0.34568  | 0       |
| chr2 | 55339820  | 55339939  | 0.12 | 0.33698  | 0       |
| chr2 | 62889846  | 62889918  | 0.07 | 0.50123  | 0       |
| chr2 | 66466834  | 66466894  | 0.06 | 0.30888  | 0       |
| chr2 | 66687552  | 66687704  | 0.15 | 0.29215  | 0.00085 |
| chr2 | 66809959  | 66809985  | 0.03 | 0.29607  | 0.00064 |
| chr2 | 66916716  | 66916737  | 0.02 | 0.38783  | 0       |
| chr2 | 66918213  | 66918305  | 0.09 | 0.4318   | 0       |
| chr2 | 67550622  | 67551130  | 0.51 | 0.37212  | 0       |
| chr2 | 67939740  | 67939758  | 0.02 | 0.30237  | 0.00021 |
| chr2 | 70322323  | 70322610  | 0.29 | 0.33906  | 0       |
| chr2 | 71126275  | 71126505  | 0.23 | 0.32013  | 0       |
| chr2 | 71133502  | 71133854  | 0.35 | 0.35015  | 0       |
| chr2 | 74663416  | 74663482  | 0.07 | 0.29718  | 0.00042 |
| chr2 | 74693332  | 74693344  | 0.01 | -0.30264 | 0.00021 |
| chr2 | 75767474  | 75767731  | 0.26 | 0.35584  | 0       |
| chr2 | 85751446  | 85751463  | 0.02 | 0.32473  | 0       |
| chr2 | 86263224  | 86263270  | 0.05 | 0.29685  | 0.00042 |
| chr2 | 88367137  | 88367362  | 0.23 | 0.2733   | 0.00064 |
| chr2 | 100722680 | 100723110 | 0.43 | 0.33523  | 0       |
| chr2 | 101434082 | 101434121 | 0.04 | -0.30948 | 0       |
| chr2 | 101541372 | 101541592 | 0.22 | 0.36568  | 0       |
| chr2 | 102445604 | 102445628 | 0.02 | 0.3767   | 0       |
| chr2 | 103131227 | 103131398 | 0.17 | -0.30248 | 0.00021 |
| chr2 | 105216040 | 105216370 | 0.33 | -0.30147 | 0.00021 |
| chr2 | 105735617 | 105735756 | 0.14 | 0.30691  | 0       |
| chr2 | 106013169 | 106013556 | 0.39 | -0.30864 | 0       |
| chr2 | 106755481 | 106755487 | 0.01 | 0.34754  | 0       |
| chr2 | 113404661 | 113405125 | 0.46 | -0.29809 | 0       |
| chr2 | 127955156 | 127955187 | 0.03 | -0.33573 | 0       |
| chr2 | 130515726 | 130515731 | 0.01 | 0.30042  | 0.00021 |
| chr2 | 131046480 | 131046551 | 0.07 | -0.31586 | 0       |



|      |           |           |      |          |         |
|------|-----------|-----------|------|----------|---------|
| chr2 | 131094827 | 131094852 | 0.03 | 0.43168  | 0       |
| chr2 | 137747619 | 137747719 | 0.1  | -0.29687 | 0.00042 |
| chr2 | 138721433 | 138721454 | 0.02 | 0.30526  | 0.00021 |
| chr2 | 144692441 | 144692640 | 0.2  | 0.30353  | 0.00021 |
| chr2 | 162282922 | 162283189 | 0.27 | 0.29779  | 0.00021 |
| chr2 | 169653213 | 169653384 | 0.17 | 0.3022   | 0       |
| chr2 | 171784674 | 171784945 | 0.27 | -0.35593 | 0       |
| chr2 | 172972840 | 172973241 | 0.4  | 0.31215  | 0       |
| chr2 | 172974138 | 172974217 | 0.08 | 0.30033  | 0.00021 |
| chr2 | 173792831 | 173792840 | 0.01 | 0.34096  | 0       |
| chr2 | 174854102 | 174854280 | 0.18 | 0.34085  | 0       |
| chr2 | 175595400 | 175595575 | 0.18 | -0.28759 | 0.00021 |
| chr2 | 176967665 | 176968052 | 0.39 | 0.32984  | 0       |
| chr2 | 179914864 | 179915033 | 0.17 | 0.32557  | 0       |
| chr2 | 187463598 | 187463618 | 0.02 | 0.34912  | 0       |
| chr2 | 190276864 | 190276928 | 0.06 | 0.30164  | 0.00021 |
| chr2 | 190430929 | 190430998 | 0.07 | 0.36061  | 0       |
| chr2 | 197124443 | 197124788 | 0.35 | 0.32864  | 0       |
| chr2 | 197237686 | 197237764 | 0.08 | 0.31256  | 0       |
| chr2 | 198540518 | 198540569 | 0.05 | 0.33916  | 0       |
| chr2 | 200819070 | 200819113 | 0.04 | -0.32755 | 0       |
| chr2 | 201173446 | 201173803 | 0.36 | 0.3285   | 0       |
| chr2 | 201725800 | 201726139 | 0.34 | 0.33786  | 0       |
| chr2 | 201980467 | 201980504 | 0.04 | -0.34484 | 0       |
| chr2 | 202297914 | 202298223 | 0.31 | 0.33875  | 0       |
| chr2 | 202561218 | 202561266 | 0.05 | 0.31187  | 0       |
| chr2 | 202562775 | 202563587 | 0.81 | 0.36168  | 0       |
| chr2 | 204102418 | 204102649 | 0.23 | -0.32    | 0       |
| chr2 | 208631081 | 208631684 | 0.6  | -0.27504 | 0.00064 |
| chr2 | 208635549 | 208635723 | 0.17 | 0.30803  | 0       |
| chr2 | 208989248 | 208989382 | 0.13 | 0.31813  | 0       |
| chr2 | 209224225 | 209224999 | 0.77 | -0.31097 | 0       |
| chr2 | 216616133 | 216616185 | 0.05 | -0.3091  | 0       |
| chr2 | 218231805 | 218231928 | 0.12 | 0.39962  | 0       |
| chr2 | 218278052 | 218278111 | 0.06 | 0.37082  | 0       |
| chr2 | 227659406 | 227659636 | 0.23 | 0.33337  | 0       |
| chr2 | 229542809 | 229542880 | 0.07 | -0.29422 | 0.00064 |
| chr2 | 231833778 | 231834241 | 0.46 | -0.33302 | 0       |
| chr2 | 231988403 | 231988509 | 0.11 | 0.28396  | 0.00042 |
| chr2 | 234296280 | 234297039 | 0.76 | 0.3093   | 0       |
| chr2 | 238578491 | 238578727 | 0.24 | 0.32734  | 0       |
| chr2 | 240143798 | 240144335 | 0.54 | 0.28933  | 0       |
| chr2 | 240230587 | 240230892 | 0.31 | 0.32284  | 0       |
| chr2 | 240866924 | 240867059 | 0.14 | -0.35728 | 0       |
| chr2 | 241095989 | 241096137 | 0.15 | -0.30389 | 0       |
| chr2 | 241458886 | 241460002 | 1.12 | 0.32619  | 0       |
| chr2 | 242811830 | 242811864 | 0.03 | -0.30291 | 0.00021 |

|      |           |           |      |          |         |
|------|-----------|-----------|------|----------|---------|
| chr3 | 2933523   | 2933549   | 0.03 | -0.2959  | 0.00064 |
| chr3 | 3706853   | 3706868   | 0.02 | -0.3019  | 0.00021 |
| chr3 | 6784036   | 6784518   | 0.48 | -0.30279 | 0.00021 |
| chr3 | 10184319  | 10184877  | 0.56 | -0.30329 | 0       |
| chr3 | 12979917  | 12980202  | 0.29 | 0.30379  | 0.00021 |
| chr3 | 15374534  | 15374586  | 0.05 | -0.30004 | 0.00021 |
| chr3 | 15823696  | 15823705  | 0.01 | 0.36647  | 0       |
| chr3 | 25498670  | 25499105  | 0.44 | 0.30765  | 0       |
| chr3 | 27761677  | 27762095  | 0.42 | 0.30273  | 0.00021 |
| chr3 | 33701101  | 33701707  | 0.61 | 0.27817  | 0       |
| chr3 | 37995561  | 37995838  | 0.28 | 0.30652  | 0       |
| chr3 | 41280495  | 41280551  | 0.06 | 0.30605  | 0       |
| chr3 | 41730160  | 41730177  | 0.02 | 0.31486  | 0       |
| chr3 | 42108724  | 42109139  | 0.42 | 0.32551  | 0       |
| chr3 | 45240278  | 45240318  | 0.04 | 0.3074   | 0       |
| chr3 | 48216875  | 48216893  | 0.02 | 0.3419   | 0       |
| chr3 | 53032818  | 53033167  | 0.35 | -0.29622 | 0       |
| chr3 | 57162032  | 57162039  | 0.01 | 0.41692  | 0       |
| chr3 | 57881959  | 57882055  | 0.1  | 0.52643  | 0       |
| chr3 | 64053561  | 64053663  | 0.1  | 0.32759  | 0       |
| chr3 | 64193180  | 64193269  | 0.09 | 0.31564  | 0       |
| chr3 | 64251663  | 64251919  | 0.26 | 0.33987  | 0       |
| chr3 | 65387308  | 65387541  | 0.23 | 0.271    | 0.00085 |
| chr3 | 70048832  | 70048926  | 0.09 | -0.34578 | 0       |
| chr3 | 71295335  | 71295390  | 0.06 | 0.31364  | 0       |
| chr3 | 97982830  | 97983540  | 0.71 | -0.2937  | 0       |
| chr3 | 99904218  | 99904527  | 0.31 | 0.32714  | 0       |
| chr3 | 101499090 | 101499503 | 0.41 | 0.29566  | 0.00064 |
| chr3 | 106782411 | 106782589 | 0.18 | 0.34702  | 0       |
| chr3 | 108180778 | 108180898 | 0.12 | 0.2995   | 0.00021 |
| chr3 | 111456713 | 111456900 | 0.19 | 0.30901  | 0       |
| chr3 | 114818612 | 114818700 | 0.09 | 0.37686  | 0       |
| chr3 | 119379414 | 119379792 | 0.38 | 0.27272  | 0.00021 |
| chr3 | 121311783 | 121312241 | 0.46 | 0.34616  | 0       |
| chr3 | 121612944 | 121612956 | 0.01 | 0.373    | 0       |
| chr3 | 123339334 | 123339918 | 0.58 | 0.37004  | 0       |
| chr3 | 123409971 | 123410034 | 0.06 | 0.29268  | 0.00085 |
| chr3 | 129276179 | 129276211 | 0.03 | 0.29601  | 0.00064 |
| chr3 | 129407365 | 129407548 | 0.18 | 0.35061  | 0       |
| chr3 | 129693385 | 129693586 | 0.2  | 0.32212  | 0       |
| chr3 | 137361526 | 137361532 | 0.01 | 0.32417  | 0       |
| chr3 | 141102599 | 141102964 | 0.37 | 0.35651  | 0       |
| chr3 | 141150514 | 141151009 | 0.5  | 0.29456  | 0.00064 |
| chr3 | 143033370 | 143033578 | 0.21 | 0.31192  | 0       |
| chr3 | 147108843 | 147108916 | 0.07 | 0.29381  | 0.00064 |
| chr3 | 147141219 | 147141588 | 0.37 | 0.31119  | 0       |
| chr3 | 156260351 | 156260776 | 0.43 | 0.43661  | 0       |

|      |           |           |      |          |         |
|------|-----------|-----------|------|----------|---------|
| chr3 | 156266748 | 156266974 | 0.23 | 0.3128   | 0       |
| chr3 | 156795456 | 156795488 | 0.03 | 0.33421  | 0       |
| chr3 | 157260593 | 157260627 | 0.03 | 0.36576  | 0       |
| chr3 | 157812018 | 157812226 | 0.21 | 0.30084  | 0.00021 |
| chr3 | 157813327 | 157813609 | 0.28 | 0.30086  | 0       |
| chr3 | 160120464 | 160120481 | 0.02 | -0.32578 | 0       |
| chr3 | 171024571 | 171024841 | 0.27 | 0.29921  | 0       |
| chr3 | 171561060 | 171561201 | 0.14 | 0.30895  | 0       |
| chr3 | 177548098 | 177548306 | 0.21 | 0.38373  | 0       |
| chr3 | 185271312 | 185271385 | 0.07 | -0.42739 | 0       |
| chr3 | 190105848 | 190105986 | 0.14 | -0.48037 | 0       |
| chr3 | 195870009 | 195870249 | 0.24 | -0.30854 | 0       |
| chr3 | 196065318 | 196065357 | 0.04 | -0.27768 | 0.00042 |
| chr3 | 196065506 | 196065569 | 0.06 | -0.33814 | 0       |
| chr3 | 197663873 | 197664106 | 0.23 | -0.29702 | 0.00042 |
| chr4 | 379900    | 380157    | 0.26 | 0.29883  | 0.00021 |
| chr4 | 839528    | 839646    | 0.12 | 0.33602  | 0       |
| chr4 | 1205359   | 1205447   | 0.09 | 0.31635  | 0       |
| chr4 | 1411578   | 1411820   | 0.24 | -0.30176 | 0.00021 |
| chr4 | 2627014   | 2627194   | 0.18 | 0.38029  | 0       |
| chr4 | 3306677   | 3306705   | 0.03 | 0.31176  | 0       |
| chr4 | 4679368   | 4679628   | 0.26 | 0.30999  | 0       |
| chr4 | 6537163   | 6537220   | 0.06 | -0.32105 | 0       |
| chr4 | 8321521   | 8321942   | 0.42 | 0.46369  | 0       |
| chr4 | 12539867  | 12539883  | 0.02 | -0.34842 | 0       |
| chr4 | 15429515  | 15429795  | 0.28 | 0.31605  | 0       |
| chr4 | 25881847  | 25881930  | 0.08 | 0.3097   | 0       |
| chr4 | 37887255  | 37887467  | 0.21 | 0.35501  | 0       |
| chr4 | 44018777  | 44018877  | 0.1  | -0.29989 | 0.00021 |
| chr4 | 46534014  | 46534428  | 0.41 | -0.31893 | 0       |
| chr4 | 54765826  | 54766004  | 0.18 | 0.31705  | 0       |
| chr4 | 56685845  | 56685972  | 0.13 | 0.3218   | 0       |
| chr4 | 57524758  | 57524770  | 0.01 | 0.30437  | 0.00021 |
| chr4 | 57776726  | 57777244  | 0.52 | -0.2897  | 0       |
| chr4 | 57985198  | 57985260  | 0.06 | 0.29317  | 0.00085 |
| chr4 | 71587640  | 71587904  | 0.26 | 0.29601  | 0       |
| chr4 | 81185022  | 81185228  | 0.21 | 0.297    | 0.00042 |
| chr4 | 83674996  | 83675797  | 0.8  | 0.35631  | 0       |
| chr4 | 84071170  | 84071553  | 0.38 | 0.37057  | 0       |
| chr4 | 88449925  | 88451496  | 1.57 | 0.43941  | 0       |
| chr4 | 89152212  | 89152554  | 0.34 | 0.33789  | 0       |
| chr4 | 95127681  | 95127703  | 0.02 | -0.31927 | 0       |
| chr4 | 100573753 | 100573850 | 0.1  | -0.31546 | 0       |
| chr4 | 100574455 | 100574653 | 0.2  | -0.34064 | 0       |
| chr4 | 100789493 | 100789506 | 0.01 | 0.33522  | 0       |
| chr4 | 114213574 | 114213914 | 0.34 | 0.31868  | 0       |
| chr4 | 114214093 | 114214449 | 0.36 | 0.33758  | 0       |

|      |           |           |      |          |         |
|------|-----------|-----------|------|----------|---------|
| chr4 | 124570965 | 124571409 | 0.44 | 0.39478  | 0       |
| chr4 | 140715901 | 140715994 | 0.09 | 0.31118  | 0       |
| chr4 | 140808454 | 140808552 | 0.1  | 0.41652  | 0       |
| chr4 | 148750768 | 148750770 | 0    | 0.3501   | 0       |
| chr4 | 151505084 | 151505192 | 0.11 | 0.2992   | 0.00021 |
| chr4 | 152097442 | 152097698 | 0.26 | 0.33535  | 0       |
| chr4 | 152580806 | 152580863 | 0.06 | 0.34573  | 0       |
| chr4 | 159094213 | 159094277 | 0.06 | 0.37122  | 0       |
| chr4 | 165788672 | 165788674 | 0    | 0.33038  | 0       |
| chr4 | 165898967 | 165899134 | 0.17 | 0.29977  | 0.00021 |
| chr4 | 185118189 | 185118314 | 0.13 | 0.3348   | 0       |
| chr4 | 187017924 | 187018050 | 0.13 | 0.32687  | 0       |
| chr4 | 189064700 | 189064756 | 0.06 | -0.31024 | 0       |
| chr5 | 1193503   | 1193724   | 0.22 | -0.30012 | 0.00021 |
| chr5 | 1752668   | 1752864   | 0.2  | -0.31019 | 0       |
| chr5 | 2241205   | 2241248   | 0.04 | -0.32322 | 0       |
| chr5 | 2258129   | 2258598   | 0.47 | -0.31206 | 0       |
| chr5 | 2276656   | 2276682   | 0.03 | -0.32723 | 0       |
| chr5 | 2291750   | 2291952   | 0.2  | -0.36836 | 0       |
| chr5 | 2335681   | 2335723   | 0.04 | -0.30887 | 0       |
| chr5 | 2338616   | 2339100   | 0.48 | -0.31225 | 0       |
| chr5 | 2515177   | 2515396   | 0.22 | -0.3034  | 0.00021 |
| chr5 | 2645802   | 2645862   | 0.06 | -0.39421 | 0       |
| chr5 | 2866388   | 2866465   | 0.08 | -0.32953 | 0       |
| chr5 | 2964805   | 2965087   | 0.28 | -0.3242  | 0       |
| chr5 | 3339474   | 3339640   | 0.17 | -0.29642 | 0       |
| chr5 | 3822924   | 3823510   | 0.59 | -0.33678 | 0       |
| chr5 | 3932193   | 3932233   | 0.04 | -0.31275 | 0       |
| chr5 | 3961212   | 3962083   | 0.87 | -0.32398 | 0       |
| chr5 | 4851084   | 4851261   | 0.18 | -0.29591 | 0.00064 |
| chr5 | 4971058   | 4971641   | 0.58 | -0.29048 | 0       |
| chr5 | 5025803   | 5025848   | 0.05 | -0.34934 | 0       |
| chr5 | 5034397   | 5034730   | 0.33 | -0.31485 | 0       |
| chr5 | 5079059   | 5079159   | 0.1  | -0.30584 | 0       |
| chr5 | 5568539   | 5568588   | 0.05 | -0.29752 | 0.00021 |
| chr5 | 6030048   | 6030096   | 0.05 | -0.31012 | 0       |
| chr5 | 6411758   | 6411956   | 0.2  | -0.2878  | 0.00021 |
| chr5 | 14183373  | 14183872  | 0.5  | 0.35602  | 0       |
| chr5 | 32445429  | 32445814  | 0.39 | -0.29503 | 0       |
| chr5 | 32584561  | 32584992  | 0.43 | -0.31139 | 0       |
| chr5 | 34504045  | 34504088  | 0.04 | 0.37532  | 0       |
| chr5 | 36239673  | 36239818  | 0.15 | 0.30042  | 0.00021 |
| chr5 | 40909520  | 40909532  | 0.01 | 0.30834  | 0       |
| chr5 | 42953543  | 42953624  | 0.08 | 0.28876  | 0       |
| chr5 | 43033934  | 43034043  | 0.11 | 0.32297  | 0       |
| chr5 | 43037519  | 43037666  | 0.15 | 0.31216  | 0       |
| chr5 | 44575014  | 44575156  | 0.14 | -0.31752 | 0       |

|      |           |           |      |          |         |
|------|-----------|-----------|------|----------|---------|
| chr5 | 50673033  | 50674015  | 0.98 | 0.30794  | 0       |
| chr5 | 54518745  | 54519023  | 0.28 | 0.30258  | 0       |
| chr5 | 55408419  | 55408595  | 0.18 | -0.36923 | 0       |
| chr5 | 55594154  | 55594466  | 0.31 | 0.30292  | 0.00021 |
| chr5 | 58652891  | 58652948  | 0.06 | 0.30358  | 0       |
| chr5 | 58653738  | 58654193  | 0.46 | 0.31211  | 0       |
| chr5 | 59481426  | 59481615  | 0.19 | 0.28216  | 0.00042 |
| chr5 | 60728124  | 60728164  | 0.04 | 0.33631  | 0       |
| chr5 | 65105878  | 65106158  | 0.28 | 0.38665  | 0       |
| chr5 | 66253919  | 66254876  | 0.96 | 0.30858  | 0       |
| chr5 | 66445526  | 66445601  | 0.08 | 0.33527  | 0       |
| chr5 | 67483109  | 67483245  | 0.14 | 0.34805  | 0       |
| chr5 | 67588130  | 67588186  | 0.06 | 0.29945  | 0.00021 |
| chr5 | 68326727  | 68326758  | 0.03 | 0.37557  | 0       |
| chr5 | 74912210  | 74912492  | 0.28 | 0.31238  | 0       |
| chr5 | 75903397  | 75903700  | 0.3  | 0.38045  | 0       |
| chr5 | 76923988  | 76924190  | 0.2  | 0.29338  | 0.00085 |
| chr5 | 76932016  | 76932062  | 0.05 | 0.29522  | 0       |
| chr5 | 77253544  | 77253555  | 0.01 | 0.31295  | 0       |
| chr5 | 77955963  | 77956305  | 0.34 | 0.31835  | 0       |
| chr5 | 78203311  | 78203576  | 0.27 | -0.32785 | 0       |
| chr5 | 78407552  | 78407562  | 0.01 | 0.29758  | 0.00021 |
| chr5 | 78407678  | 78407683  | 0.01 | 0.3376   | 0       |
| chr5 | 82262468  | 82262646  | 0.18 | 0.29748  | 0.00021 |
| chr5 | 92923396  | 92923623  | 0.23 | 0.33967  | 0       |
| chr5 | 115379533 | 115379954 | 0.42 | 0.29719  | 0.00042 |
| chr5 | 124711839 | 124711972 | 0.13 | 0.30602  | 0       |
| chr5 | 125706935 | 125707117 | 0.18 | 0.27165  | 0.00085 |
| chr5 | 131516837 | 131516877 | 0.04 | 0.27735  | 0.00042 |
| chr5 | 134735637 | 134735654 | 0.02 | 0.29724  | 0.00042 |
| chr5 | 138440656 | 138441071 | 0.42 | 0.35923  | 0       |
| chr5 | 140457553 | 140457609 | 0.06 | 0.29012  | 0       |
| chr5 | 140501365 | 140501451 | 0.09 | 0.3064   | 0       |
| chr5 | 140613859 | 140613998 | 0.14 | 0.2966   | 0       |
| chr5 | 140619446 | 140619586 | 0.14 | 0.30437  | 0       |
| chr5 | 140624888 | 140625059 | 0.17 | 0.28753  | 0       |
| chr5 | 140723455 | 140723549 | 0.09 | 0.30987  | 0       |
| chr5 | 140743575 | 140743780 | 0.21 | 0.30949  | 0       |
| chr5 | 140772148 | 140772182 | 0.03 | 0.28877  | 0       |
| chr5 | 140778342 | 140778424 | 0.08 | 0.31267  | 0       |
| chr5 | 140782277 | 140782510 | 0.23 | 0.29651  | 0       |
| chr5 | 140798095 | 140798188 | 0.09 | 0.33524  | 0       |
| chr5 | 140799541 | 140799572 | 0.03 | 0.31133  | 0       |
| chr5 | 140801286 | 140801482 | 0.2  | 0.31121  | 0       |
| chr5 | 140805681 | 140805841 | 0.16 | 0.34329  | 0       |
| chr5 | 140810051 | 140810433 | 0.38 | 0.28981  | 0       |
| chr5 | 140810920 | 140811102 | 0.18 | 0.36933  | 0       |

|      |           |           |      |          |         |
|------|-----------|-----------|------|----------|---------|
| chr5 | 140811312 | 140811642 | 0.33 | 0.34398  | 0       |
| chr5 | 142159386 | 142159393 | 0.01 | 0.41247  | 0       |
| chr5 | 142922486 | 142922506 | 0.02 | 0.32142  | 0       |
| chr5 | 158139210 | 158139306 | 0.1  | -0.32911 | 0       |
| chr5 | 159596570 | 159597030 | 0.46 | 0.31486  | 0       |
| chr5 | 163893881 | 163894003 | 0.12 | -0.34014 | 0       |
| chr5 | 164668488 | 164668958 | 0.47 | -0.2631  | 0.00085 |
| chr5 | 167242169 | 167242266 | 0.1  | -0.344   | 0       |
| chr5 | 171830914 | 171831028 | 0.11 | 0.31627  | 0       |
| chr5 | 172447213 | 172447638 | 0.43 | 0.30073  | 0.00021 |
| chr5 | 173318556 | 173318755 | 0.2  | 0.32755  | 0       |
| chr5 | 175969350 | 175969383 | 0.03 | -0.29475 | 0.00064 |
| chr5 | 180047184 | 180047407 | 0.22 | -0.31531 | 0       |
| chr5 | 180591594 | 180591704 | 0.11 | 0.29305  | 0.00085 |
| chr6 | 1385731   | 1386142   | 0.41 | 0.30507  | 0       |
| chr6 | 1391758   | 1392624   | 0.87 | 0.29062  | 0       |
| chr6 | 5132887   | 5133188   | 0.3  | 0.3079   | 0       |
| chr6 | 6737080   | 6737631   | 0.55 | 0.27298  | 0.00085 |
| chr6 | 10390811  | 10391412  | 0.6  | 0.34583  | 0       |
| chr6 | 10393497  | 10393778  | 0.28 | 0.37505  | 0       |
| chr6 | 10416373  | 10416531  | 0.16 | 0.27189  | 0.00021 |
| chr6 | 10417087  | 10418121  | 1.03 | 0.27257  | 0       |
| chr6 | 10422636  | 10422874  | 0.24 | 0.34371  | 0       |
| chr6 | 10555682  | 10555881  | 0.2  | 0.32784  | 0       |
| chr6 | 11607923  | 11607982  | 0.06 | 0.33285  | 0       |
| chr6 | 11805824  | 11806115  | 0.29 | -0.34553 | 0       |
| chr6 | 13874574  | 13874679  | 0.11 | -0.41019 | 0       |
| chr6 | 15463247  | 15463343  | 0.1  | 0.37923  | 0       |
| chr6 | 16337711  | 16337921  | 0.21 | 0.3017   | 0.00021 |
| chr6 | 16352321  | 16352745  | 0.42 | 0.33974  | 0       |
| chr6 | 16747686  | 16748160  | 0.47 | 0.41707  | 0       |
| chr6 | 17289613  | 17290146  | 0.53 | 0.29138  | 0       |
| chr6 | 17470162  | 17470599  | 0.44 | 0.31587  | 0       |
| chr6 | 18824218  | 18824224  | 0.01 | 0.30075  | 0.00021 |
| chr6 | 22056238  | 22056734  | 0.5  | 0.29446  | 0.00064 |
| chr6 | 25650786  | 25651144  | 0.36 | -0.29926 | 0.00021 |
| chr6 | 26225246  | 26225407  | 0.16 | 0.30462  | 0       |
| chr6 | 26226203  | 26226256  | 0.05 | 0.35531  | 0       |
| chr6 | 27173633  | 27173991  | 0.36 | 0.32536  | 0       |
| chr6 | 27730551  | 27730563  | 0.01 | 0.30283  | 0.00021 |
| chr6 | 27832098  | 27832180  | 0.08 | 0.33344  | 0       |
| chr6 | 28058724  | 28059208  | 0.48 | 0.33345  | 0       |
| chr6 | 28226885  | 28227482  | 0.6  | 0.31662  | 0       |
| chr6 | 28945322  | 28945341  | 0.02 | 0.29126  | 0       |
| chr6 | 30130819  | 30131001  | 0.18 | -0.35195 | 0       |
| chr6 | 30420981  | 30421089  | 0.11 | 0.29441  | 0.00064 |
| chr6 | 31734147  | 31734580  | 0.43 | 0.29511  | 0       |

|      |           |           |      |          |         |
|------|-----------|-----------|------|----------|---------|
| chr6 | 31746808  | 31746814  | 0.01 | -0.33121 | 0       |
| chr6 | 31938773  | 31938847  | 0.07 | -0.29357 | 0       |
| chr6 | 32060681  | 32061084  | 0.4  | 0.2997   | 0       |
| chr6 | 33173482  | 33173501  | 0.02 | -0.30023 | 0       |
| chr6 | 34482460  | 34482679  | 0.22 | 0.30737  | 0       |
| chr6 | 34984836  | 34984930  | 0.09 | 0.33406  | 0       |
| chr6 | 35479628  | 35479648  | 0.02 | 0.33164  | 0       |
| chr6 | 38672050  | 38672343  | 0.29 | 0.34808  | 0       |
| chr6 | 42145954  | 42146052  | 0.1  | 0.35387  | 0       |
| chr6 | 42788563  | 42789053  | 0.49 | 0.32319  | 0       |
| chr6 | 43082234  | 43082296  | 0.06 | 0.36877  | 0       |
| chr6 | 43117933  | 43118059  | 0.13 | 0.31741  | 0       |
| chr6 | 43478692  | 43478829  | 0.14 | -0.27201 | 0.00085 |
| chr6 | 47066614  | 47066683  | 0.07 | 0.36406  | 0       |
| chr6 | 48842056  | 48842122  | 0.07 | -0.32292 | 0       |
| chr6 | 50480396  | 50480537  | 0.14 | -0.30275 | 0.00021 |
| chr6 | 50481291  | 50481652  | 0.36 | -0.30695 | 0       |
| chr6 | 76203642  | 76204172  | 0.53 | 0.27342  | 0.00021 |
| chr6 | 76802339  | 76802592  | 0.25 | -0.29536 | 0       |
| chr6 | 90271380  | 90271989  | 0.61 | 0.29232  | 0       |
| chr6 | 90272057  | 90272492  | 0.44 | 0.31643  | 0       |
| chr6 | 92401486  | 92401545  | 0.06 | -0.37791 | 0       |
| chr6 | 100911709 | 100911746 | 0.04 | 0.28316  | 0.00042 |
| chr6 | 100915395 | 100915805 | 0.41 | 0.29232  | 0       |
| chr6 | 100916916 | 100916959 | 0.04 | 0.29494  | 0.00064 |
| chr6 | 101846797 | 101846805 | 0.01 | 0.31344  | 0       |
| chr6 | 105388153 | 105388191 | 0.04 | 0.29437  | 0.00064 |
| chr6 | 105388668 | 105388731 | 0.06 | 0.31593  | 0       |
| chr6 | 105400884 | 105400993 | 0.11 | 0.37056  | 0       |
| chr6 | 108492653 | 108492769 | 0.12 | 0.28139  | 0.00042 |
| chr6 | 108977419 | 108977456 | 0.04 | 0.29545  | 0.00064 |
| chr6 | 109072250 | 109072674 | 0.42 | -0.31768 | 0       |
| chr6 | 109274429 | 109274464 | 0.04 | 0.32559  | 0       |
| chr6 | 109778433 | 109778491 | 0.06 | 0.31893  | 0       |
| chr6 | 111194645 | 111194786 | 0.14 | -0.29428 | 0.00064 |
| chr6 | 111688745 | 111689217 | 0.47 | 0.38203  | 0       |
| chr6 | 111888540 | 111888567 | 0.03 | 0.3033   | 0.00021 |
| chr6 | 111888652 | 111888683 | 0.03 | 0.29393  | 0       |
| chr6 | 111920891 | 111920977 | 0.09 | 0.40711  | 0       |
| chr6 | 111947606 | 111947780 | 0.17 | 0.29382  | 0.00064 |
| chr6 | 111968372 | 111968560 | 0.19 | 0.3155   | 0       |
| chr6 | 112572461 | 112572936 | 0.48 | 0.35709  | 0       |
| chr6 | 134589516 | 134589589 | 0.07 | -0.3526  | 0       |
| chr6 | 135376695 | 135376777 | 0.08 | -0.31714 | 0       |
| chr6 | 138866882 | 138867125 | 0.24 | 0.32631  | 0       |
| chr6 | 144223298 | 144223614 | 0.32 | 0.35977  | 0       |
| chr6 | 144904205 | 144904306 | 0.1  | 0.31545  | 0       |

|      |           |           |      |          |         |
|------|-----------|-----------|------|----------|---------|
| chr6 | 150023044 | 150023289 | 0.25 | 0.30251  | 0       |
| chr6 | 151521252 | 151521637 | 0.39 | 0.32894  | 0       |
| chr6 | 151937260 | 151937653 | 0.39 | 0.31969  | 0       |
| chr6 | 152011103 | 152011415 | 0.31 | 0.30174  | 0       |
| chr6 | 152702330 | 152702660 | 0.33 | 0.30679  | 0       |
| chr6 | 152723267 | 152723414 | 0.15 | -0.29529 | 0.00064 |
| chr6 | 157161359 | 157161545 | 0.19 | 0.32538  | 0       |
| chr6 | 157464871 | 157465138 | 0.27 | 0.30343  | 0.00021 |
| chr6 | 159487527 | 159487544 | 0.02 | 0.33485  | 0       |
| chr6 | 161678989 | 161679078 | 0.09 | 0.3251   | 0       |
| chr6 | 166247032 | 166247348 | 0.32 | -0.31335 | 0       |
| chr6 | 168378673 | 168378810 | 0.14 | -0.32657 | 0       |
| chr6 | 168379043 | 168379113 | 0.07 | -0.34393 | 0       |
| chr6 | 169350747 | 169351479 | 0.73 | 0.28614  | 0       |
| chr6 | 169399712 | 169399762 | 0.05 | -0.2963  | 0       |
| chr6 | 169740686 | 169740781 | 0.1  | -0.34732 | 0       |
| chr6 | 170361474 | 170361827 | 0.35 | 0.32186  | 0       |
| chr7 | 543447    | 543509    | 0.06 | 0.31469  | 0       |
| chr7 | 675530    | 676094    | 0.56 | -0.34818 | 0       |
| chr7 | 705435    | 705693    | 0.26 | 0.31868  | 0       |
| chr7 | 810958    | 811786    | 0.83 | 0.39183  | 0       |
| chr7 | 837297    | 837536    | 0.24 | 0.33159  | 0       |
| chr7 | 881634    | 881651    | 0.02 | 0.29994  | 0.00021 |
| chr7 | 1303351   | 1303448   | 0.1  | -0.37472 | 0       |
| chr7 | 1333612   | 1333912   | 0.3  | -0.3001  | 0.00021 |
| chr7 | 1437272   | 1437409   | 0.14 | -0.31311 | 0       |
| chr7 | 1718485   | 1718541   | 0.06 | -0.28694 | 0.00021 |
| chr7 | 1793077   | 1793191   | 0.11 | -0.29065 | 0       |
| chr7 | 2144559   | 2144579   | 0.02 | 0.3099   | 0       |
| chr7 | 4746837   | 4747026   | 0.19 | 0.30355  | 0       |
| chr7 | 4747216   | 4747261   | 0.05 | 0.31528  | 0       |
| chr7 | 4848814   | 4848939   | 0.13 | -0.33142 | 0       |
| chr7 | 5711782   | 5712269   | 0.49 | 0.33518  | 0       |
| chr7 | 12410026  | 12410033  | 0.01 | 0.31512  | 0       |
| chr7 | 18678293  | 18678642  | 0.35 | 0.31243  | 0       |
| chr7 | 23387365  | 23387575  | 0.21 | -0.31703 | 0       |
| chr7 | 27160520  | 27160960  | 0.44 | 0.29721  | 0       |
| chr7 | 27181067  | 27181671  | 0.6  | 0.28632  | 0       |
| chr7 | 29519323  | 29519656  | 0.33 | 0.28803  | 0       |
| chr7 | 30810183  | 30810504  | 0.32 | -0.34235 | 0       |
| chr7 | 33196871  | 33197291  | 0.42 | 0.30177  | 0.00021 |
| chr7 | 33767199  | 33767428  | 0.23 | -0.29554 | 0.00064 |
| chr7 | 34361111  | 34361199  | 0.09 | -0.35642 | 0       |
| chr7 | 42237160  | 42237350  | 0.19 | -0.37753 | 0       |
| chr7 | 43288411  | 43289038  | 0.63 | -0.32047 | 0       |
| chr7 | 43652291  | 43652643  | 0.35 | 0.35355  | 0       |
| chr7 | 47431773  | 47432311  | 0.54 | 0.29572  | 0       |



|      |           |           |      |          |         |
|------|-----------|-----------|------|----------|---------|
| chr7 | 47475566  | 47475653  | 0.09 | 0.30524  | 0.00021 |
| chr7 | 53103789  | 53104336  | 0.55 | -0.27385 | 0.00064 |
| chr7 | 56297564  | 56297579  | 0.02 | 0.31509  | 0       |
| chr7 | 65579017  | 65579080  | 0.06 | -0.28827 | 0.00021 |
| chr7 | 66398301  | 66398313  | 0.01 | 0.29538  | 0.00064 |
| chr7 | 71868406  | 71868494  | 0.09 | -0.3799  | 0       |
| chr7 | 75596992  | 75597100  | 0.11 | 0.28116  | 0.00042 |
| chr7 | 80231483  | 80231599  | 0.12 | 0.29111  | 0       |
| chr7 | 87941609  | 87941769  | 0.16 | 0.30028  | 0.00021 |
| chr7 | 95115163  | 95115232  | 0.07 | 0.32211  | 0       |
| chr7 | 96622311  | 96622709  | 0.4  | 0.28275  | 0.00042 |
| chr7 | 97952898  | 97953106  | 0.21 | 0.31376  | 0       |
| chr7 | 99229440  | 99229650  | 0.21 | 0.33567  | 0       |
| chr7 | 100881113 | 100881325 | 0.21 | 0.29538  | 0       |
| chr7 | 101518619 | 101518899 | 0.28 | 0.474    | 0       |
| chr7 | 101579929 | 101580127 | 0.2  | 0.36622  | 0       |
| chr7 | 101799198 | 101799218 | 0.02 | 0.35202  | 0       |
| chr7 | 102574105 | 102574445 | 0.34 | 0.30273  | 0       |
| chr7 | 102790406 | 102790498 | 0.09 | -0.29612 | 0.00064 |
| chr7 | 107235907 | 107236140 | 0.23 | 0.34274  | 0       |
| chr7 | 110731116 | 110731201 | 0.09 | 0.3076   | 0       |
| chr7 | 116654858 | 116654903 | 0.05 | 0.34597  | 0       |
| chr7 | 117119195 | 117119637 | 0.44 | 0.29825  | 0       |
| chr7 | 129868685 | 129868786 | 0.1  | 0.3176   | 0       |
| chr7 | 130125511 | 130125756 | 0.25 | -0.33787 | 0       |
| chr7 | 130125932 | 130125976 | 0.04 | -0.28837 | 0.00021 |
| chr7 | 130646051 | 130646078 | 0.03 | -0.36311 | 0       |
| chr7 | 134571320 | 134571494 | 0.17 | 0.37587  | 0       |
| chr7 | 137659854 | 137660322 | 0.47 | 0.33405  | 0       |
| chr7 | 137749927 | 137750050 | 0.12 | 0.3614   | 0       |
| chr7 | 138312290 | 138312324 | 0.03 | 0.31943  | 0       |
| chr7 | 143582499 | 143582511 | 0.01 | 0.38368  | 0       |
| chr7 | 143582630 | 143582650 | 0.02 | 0.30923  | 0       |
| chr7 | 149112318 | 149112402 | 0.08 | 0.30645  | 0       |
| chr7 | 150686728 | 150686735 | 0.01 | 0.32485  | 0       |
| chr7 | 151565595 | 151565731 | 0.14 | 0.27304  | 0.00021 |
| chr7 | 151840010 | 151840170 | 0.16 | 0.32283  | 0       |
| chr7 | 154401472 | 154401618 | 0.15 | -0.31136 | 0       |
| chr7 | 154542235 | 154542313 | 0.08 | -0.29896 | 0.00021 |
| chr7 | 154867682 | 154867763 | 0.08 | -0.30702 | 0       |
| chr7 | 155581411 | 155581623 | 0.21 | -0.33498 | 0       |
| chr7 | 155744340 | 155744544 | 0.2  | -0.40551 | 0       |
| chr7 | 156943639 | 156943877 | 0.24 | 0.33247  | 0       |
| chr7 | 157261163 | 157261603 | 0.44 | -0.2935  | 0.00064 |
| chr7 | 157280713 | 157281332 | 0.62 | -0.32736 | 0       |
| chr7 | 157293538 | 157293544 | 0.01 | -0.44856 | 0       |
| chr7 | 157294107 | 157294502 | 0.4  | -0.31741 | 0       |

|      |           |           |      |          |         |
|------|-----------|-----------|------|----------|---------|
| chr7 | 157320369 | 157320516 | 0.15 | -0.27921 | 0.00042 |
| chr7 | 157332818 | 157333010 | 0.19 | -0.32093 | 0       |
| chr7 | 157334162 | 157334648 | 0.49 | -0.30356 | 0.00021 |
| chr7 | 157340390 | 157340554 | 0.16 | -0.32622 | 0       |
| chr7 | 157345566 | 157345659 | 0.09 | -0.33967 | 0       |
| chr7 | 157345827 | 157347375 | 1.55 | -0.30321 | 0       |
| chr7 | 157351620 | 157351708 | 0.09 | -0.36094 | 0       |
| chr7 | 157352978 | 157353191 | 0.21 | -0.295   | 0       |
| chr7 | 157357887 | 157357947 | 0.06 | -0.3244  | 0       |
| chr7 | 157367142 | 157367871 | 0.73 | -0.31268 | 0       |
| chr7 | 157391030 | 157391297 | 0.27 | -0.27534 | 0.00064 |
| chr7 | 157402529 | 157402637 | 0.11 | -0.31118 | 0       |
| chr7 | 157408632 | 157408770 | 0.14 | -0.32194 | 0       |
| chr7 | 157411039 | 157411142 | 0.1  | -0.30248 | 0.00021 |
| chr7 | 157412886 | 157413057 | 0.17 | -0.30435 | 0.00021 |
| chr7 | 157423165 | 157423211 | 0.05 | -0.35672 | 0       |
| chr7 | 157435200 | 157435297 | 0.1  | -0.30743 | 0       |
| chr7 | 157438537 | 157438616 | 0.08 | -0.29615 | 0.00064 |
| chr7 | 157460477 | 157460657 | 0.18 | -0.30831 | 0       |
| chr7 | 157467966 | 157468132 | 0.17 | -0.2974  | 0       |
| chr7 | 157502732 | 157502966 | 0.23 | -0.30948 | 0       |
| chr7 | 157514730 | 157514822 | 0.09 | -0.31024 | 0       |
| chr7 | 157523356 | 157523541 | 0.19 | -0.29531 | 0       |
| chr7 | 157534363 | 157534758 | 0.4  | -0.30213 | 0.00021 |
| chr7 | 157568273 | 157568392 | 0.12 | -0.30779 | 0       |
| chr7 | 157579745 | 157579880 | 0.14 | -0.36406 | 0       |
| chr7 | 157584081 | 157584183 | 0.1  | -0.33008 | 0       |
| chr7 | 157605569 | 157605684 | 0.12 | -0.39039 | 0       |
| chr7 | 157620445 | 157620685 | 0.24 | -0.36166 | 0       |
| chr7 | 157622032 | 157622138 | 0.11 | -0.33878 | 0       |
| chr7 | 157624788 | 157624958 | 0.17 | -0.28637 | 0.00021 |
| chr7 | 157630174 | 157630250 | 0.08 | -0.33351 | 0       |
| chr7 | 157691541 | 157691591 | 0.05 | -0.33692 | 0       |
| chr7 | 157695026 | 157695230 | 0.2  | -0.30166 | 0.00021 |
| chr7 | 157695428 | 157695747 | 0.32 | -0.30717 | 0       |
| chr7 | 157738245 | 157738287 | 0.04 | -0.29754 | 0.00021 |
| chr7 | 157744316 | 157744347 | 0.03 | -0.42483 | 0       |
| chr7 | 157794069 | 157794688 | 0.62 | -0.33913 | 0       |
| chr7 | 157854693 | 157854772 | 0.08 | -0.2974  | 0       |
| chr7 | 157867291 | 157867695 | 0.4  | -0.26586 | 0.00064 |
| chr7 | 157916077 | 157916580 | 0.5  | -0.28745 | 0       |
| chr7 | 157919649 | 157919982 | 0.33 | -0.28464 | 0.00042 |
| chr7 | 157932168 | 157933354 | 1.19 | -0.30598 | 0       |
| chr7 | 157935557 | 157935968 | 0.41 | -0.31764 | 0       |
| chr7 | 157950418 | 157950633 | 0.22 | -0.30919 | 0       |
| chr7 | 157951471 | 157951799 | 0.33 | -0.30328 | 0.00021 |
| chr7 | 157953501 | 157953935 | 0.43 | -0.30218 | 0.00021 |

|      |           |           |      |          |         |
|------|-----------|-----------|------|----------|---------|
| chr7 | 157955692 | 157956042 | 0.35 | -0.3515  | 0       |
| chr7 | 157957646 | 157958261 | 0.62 | -0.35761 | 0       |
| chr7 | 157958671 | 157958806 | 0.14 | -0.29235 | 0       |
| chr7 | 157968629 | 157968683 | 0.05 | -0.32499 | 0       |
| chr7 | 157981337 | 157981849 | 0.51 | -0.28273 | 0.00042 |
| chr7 | 157985113 | 157985171 | 0.06 | -0.32088 | 0       |
| chr7 | 158037729 | 158038118 | 0.39 | -0.27099 | 0.00021 |
| chr7 | 158045980 | 158046358 | 0.38 | -0.31698 | 0       |
| chr7 | 158050413 | 158050618 | 0.21 | -0.29894 | 0.00021 |
| chr7 | 158059396 | 158059704 | 0.31 | -0.30106 | 0.00021 |
| chr7 | 158072687 | 158073079 | 0.39 | -0.33733 | 0       |
| chr7 | 158093250 | 158093277 | 0.03 | -0.30389 | 0.00021 |
| chr7 | 158107284 | 158107723 | 0.44 | -0.27754 | 0.00042 |
| chr7 | 158279818 | 158279846 | 0.03 | -0.31753 | 0       |
| chr7 | 158349388 | 158349441 | 0.05 | -0.31283 | 0       |
| chr7 | 158354692 | 158355003 | 0.31 | -0.32433 | 0       |
| chr7 | 158575681 | 158575934 | 0.25 | 0.28067  | 0.00042 |
| chr8 | 1051703   | 1051814   | 0.11 | -0.37271 | 0       |
| chr8 | 1054487   | 1054717   | 0.23 | -0.35182 | 0       |
| chr8 | 1136200   | 1136444   | 0.24 | -0.26824 | 0.00042 |
| chr8 | 1311063   | 1311576   | 0.51 | -0.27533 | 0.00021 |
| chr8 | 1339049   | 1340584   | 1.54 | -0.30193 | 0       |
| chr8 | 1443368   | 1443908   | 0.54 | -0.27216 | 0.00085 |
| chr8 | 1448361   | 1449634   | 1.27 | -0.28978 | 0       |
| chr8 | 1497878   | 1498266   | 0.39 | -0.31248 | 0       |
| chr8 | 1906312   | 1906338   | 0.03 | 0.31     | 0       |
| chr8 | 1971471   | 1971479   | 0.01 | -0.30709 | 0       |
| chr8 | 2024193   | 2024249   | 0.06 | -0.30901 | 0       |
| chr8 | 2088209   | 2088595   | 0.39 | -0.27293 | 0.00085 |
| chr8 | 2419822   | 2420061   | 0.24 | -0.34557 | 0       |
| chr8 | 3047536   | 3047756   | 0.22 | -0.35485 | 0       |
| chr8 | 3245076   | 3245147   | 0.07 | -0.3338  | 0       |
| chr8 | 3565626   | 3566118   | 0.49 | -0.33743 | 0       |
| chr8 | 3855415   | 3855502   | 0.09 | -0.2929  | 0.00085 |
| chr8 | 4987083   | 4987358   | 0.28 | -0.31027 | 0       |
| chr8 | 6323131   | 6323299   | 0.17 | 0.41137  | 0       |
| chr8 | 6420726   | 6420770   | 0.04 | 0.31706  | 0       |
| chr8 | 8748536   | 8748792   | 0.26 | -0.36029 | 0       |
| chr8 | 9105451   | 9105620   | 0.17 | 0.33771  | 0       |
| chr8 | 13706623  | 13707244  | 0.62 | -0.27215 | 0.00085 |
| chr8 | 17258080  | 17258246  | 0.17 | 0.34789  | 0       |
| chr8 | 17554904  | 17555302  | 0.4  | 0.27301  | 0.00064 |
| chr8 | 22925443  | 22925455  | 0.01 | -0.30433 | 0.00021 |
| chr8 | 27466501  | 27466508  | 0.01 | 0.38097  | 0       |
| chr8 | 28912915  | 28913104  | 0.19 | 0.31255  | 0       |
| chr8 | 29356671  | 29357029  | 0.36 | -0.3371  | 0       |
| chr8 | 29732519  | 29732547  | 0.03 | 0.32401  | 0       |

|      |           |           |      |          |         |
|------|-----------|-----------|------|----------|---------|
| chr8 | 29732579  | 29732714  | 0.14 | 0.30496  | 0       |
| chr8 | 30244710  | 30245118  | 0.41 | 0.34449  | 0       |
| chr8 | 30401028  | 30401046  | 0.02 | 0.37052  | 0       |
| chr8 | 30420852  | 30420906  | 0.05 | 0.34819  | 0       |
| chr8 | 35581557  | 35581595  | 0.04 | -0.31681 | 0       |
| chr8 | 35718561  | 35718698  | 0.14 | -0.32646 | 0       |
| chr8 | 35953501  | 35953736  | 0.24 | -0.33381 | 0       |
| chr8 | 37457295  | 37457573  | 0.28 | 0.30949  | 0       |
| chr8 | 38562303  | 38562556  | 0.25 | 0.3206   | 0       |
| chr8 | 38627889  | 38628418  | 0.53 | 0.30345  | 0       |
| chr8 | 42066048  | 42066228  | 0.18 | 0.33291  | 0       |
| chr8 | 42103037  | 42103068  | 0.03 | 0.30666  | 0       |
| chr8 | 42125496  | 42125522  | 0.03 | 0.44201  | 0       |
| chr8 | 42358481  | 42359099  | 0.62 | 0.41008  | 0       |
| chr8 | 48044616  | 48044856  | 0.24 | -0.40628 | 0       |
| chr8 | 48920450  | 48920460  | 0.01 | -0.31941 | 0       |
| chr8 | 50080767  | 50081162  | 0.4  | -0.2788  | 0.00042 |
| chr8 | 50241884  | 50241940  | 0.06 | -0.31093 | 0       |
| chr8 | 50424882  | 50425219  | 0.34 | -0.31343 | 0       |
| chr8 | 50653870  | 50653901  | 0.03 | -0.34892 | 0       |
| chr8 | 52721802  | 52722237  | 0.44 | 0.30116  | 0       |
| chr8 | 59058660  | 59059235  | 0.58 | -0.31338 | 0       |
| chr8 | 65525631  | 65525669  | 0.04 | -0.30304 | 0.00021 |
| chr8 | 67472194  | 67472493  | 0.3  | 0.43866  | 0       |
| chr8 | 67975874  | 67975895  | 0.02 | -0.32985 | 0       |
| chr8 | 67981092  | 67981112  | 0.02 | 0.31375  | 0       |
| chr8 | 70246362  | 70246492  | 0.13 | -0.30122 | 0.00021 |
| chr8 | 71069942  | 71070339  | 0.4  | 0.35861  | 0       |
| chr8 | 80836065  | 80836322  | 0.26 | 0.31957  | 0       |
| chr8 | 82530924  | 82530967  | 0.04 | 0.33462  | 0       |
| chr8 | 83073052  | 83073193  | 0.14 | -0.31994 | 0       |
| chr8 | 86568078  | 86568163  | 0.09 | -0.29675 | 0       |
| chr8 | 91952744  | 91953125  | 0.38 | 0.3179   | 0       |
| chr8 | 96393868  | 96394047  | 0.18 | 0.36904  | 0       |
| chr8 | 99951151  | 99951730  | 0.58 | 0.3084   | 0       |
| chr8 | 99955439  | 99955610  | 0.17 | 0.30191  | 0       |
| chr8 | 99959430  | 99959602  | 0.17 | 0.29391  | 0       |
| chr8 | 99961122  | 99962347  | 1.23 | 0.36794  | 0       |
| chr8 | 103395266 | 103395625 | 0.36 | 0.35358  | 0       |
| chr8 | 103741780 | 103742123 | 0.34 | 0.31245  | 0       |
| chr8 | 109800338 | 109800379 | 0.04 | -0.30007 | 0.00021 |
| chr8 | 110380981 | 110381021 | 0.04 | 0.44953  | 0       |
| chr8 | 110615382 | 110615865 | 0.48 | 0.29293  | 0.00085 |
| chr8 | 121208577 | 121208681 | 0.1  | 0.34471  | 0       |
| chr8 | 121825470 | 121825702 | 0.23 | -0.30354 | 0.00021 |
| chr8 | 124526525 | 124526866 | 0.34 | 0.34178  | 0       |
| chr8 | 126082836 | 126083119 | 0.28 | 0.30218  | 0.00021 |

|       |           |           |      |          |         |
|-------|-----------|-----------|------|----------|---------|
| chr8  | 128808017 | 128808262 | 0.25 | -0.31715 | 0       |
| chr8  | 129061191 | 129061382 | 0.19 | 0.3801   | 0       |
| chr8  | 138493473 | 138493933 | 0.46 | -0.33263 | 0       |
| chr8  | 139074557 | 139074614 | 0.06 | -0.27455 | 0.00064 |
| chr8  | 140119546 | 140120087 | 0.54 | -0.30987 | 0       |
| chr8  | 140630155 | 140630180 | 0.03 | -0.2988  | 0.00021 |
| chr8  | 143623372 | 143623661 | 0.29 | -0.28625 | 0.00021 |
| chr8  | 143694305 | 143694620 | 0.32 | -0.31818 | 0       |
| chr8  | 144639901 | 144640043 | 0.14 | -0.30302 | 0.00021 |
| chr8  | 144797929 | 144797967 | 0.04 | -0.28159 | 0.00042 |
| chr9  | 841067    | 841270    | 0.2  | 0.30487  | 0.00021 |
| chr9  | 6215327   | 6215640   | 0.31 | 0.28662  | 0.00021 |
| chr9  | 7147104   | 7147265   | 0.16 | 0.34131  | 0       |
| chr9  | 14180661  | 14180824  | 0.16 | 0.39989  | 0       |
| chr9  | 14563979  | 14564157  | 0.18 | 0.27985  | 0.00042 |
| chr9  | 21966564  | 21967469  | 0.91 | 0.33614  | 0       |
| chr9  | 35538922  | 35539509  | 0.59 | 0.26846  | 0.00042 |
| chr9  | 71440805  | 71440828  | 0.02 | 0.29501  | 0.00064 |
| chr9  | 84228185  | 84228672  | 0.49 | 0.3089   | 0       |
| chr9  | 85019920  | 85020050  | 0.13 | 0.38185  | 0       |
| chr9  | 89422493  | 89422603  | 0.11 | 0.40649  | 0       |
| chr9  | 90452294  | 90452467  | 0.17 | 0.28924  | 0       |
| chr9  | 95187808  | 95188039  | 0.23 | 0.34709  | 0       |
| chr9  | 95244844  | 95244874  | 0.03 | 0.33773  | 0       |
| chr9  | 95969598  | 95970064  | 0.47 | 0.29502  | 0.00064 |
| chr9  | 97818542  | 97818968  | 0.43 | 0.33038  | 0       |
| chr9  | 100617999 | 100618115 | 0.12 | 0.3232   | 0       |
| chr9  | 100850334 | 100850337 | 0    | 0.37378  | 0       |
| chr9  | 109684300 | 109684453 | 0.15 | 0.30498  | 0.00021 |
| chr9  | 117150236 | 117150495 | 0.26 | 0.30442  | 0       |
| chr9  | 124979184 | 124979356 | 0.17 | 0.35258  | 0       |
| chr9  | 125795488 | 125795935 | 0.45 | 0.29835  | 0       |
| chr9  | 127019325 | 127019707 | 0.38 | -0.28182 | 0.00021 |
| chr9  | 128235091 | 128235430 | 0.34 | 0.36479  | 0       |
| chr9  | 129972490 | 129972678 | 0.19 | 0.30099  | 0.00021 |
| chr9  | 130853572 | 130854132 | 0.56 | 0.30747  | 0       |
| chr9  | 131679477 | 131679780 | 0.3  | 0.32656  | 0       |
| chr9  | 133567787 | 133567903 | 0.12 | 0.32738  | 0       |
| chr9  | 138289410 | 138289504 | 0.09 | -0.31035 | 0       |
| chr9  | 140400563 | 140400693 | 0.13 | -0.39224 | 0       |
| chr10 | 616959    | 617105    | 0.15 | 0.33241  | 0       |
| chr10 | 695844    | 695900    | 0.06 | 0.37141  | 0       |
| chr10 | 1195844   | 1195916   | 0.07 | 0.31025  | 0       |
| chr10 | 1715848   | 1715879   | 0.03 | -0.29246 | 0.00085 |
| chr10 | 1850312   | 1850372   | 0.06 | -0.32857 | 0       |
| chr10 | 2125396   | 2125911   | 0.52 | -0.28197 | 0.00042 |
| chr10 | 2541463   | 2541820   | 0.36 | -0.30926 | 0       |

|       |           |           |      |          |         |
|-------|-----------|-----------|------|----------|---------|
| chr10 | 2699291   | 2699357   | 0.07 | -0.34277 | 0       |
| chr10 | 3329765   | 3329966   | 0.2  | -0.35541 | 0       |
| chr10 | 3805252   | 3805441   | 0.19 | -0.39363 | 0       |
| chr10 | 5060432   | 5060566   | 0.13 | 0.33507  | 0       |
| chr10 | 7088654   | 7088771   | 0.12 | -0.30237 | 0.00021 |
| chr10 | 7215201   | 7215341   | 0.14 | -0.31991 | 0       |
| chr10 | 11047435  | 11047586  | 0.15 | -0.30268 | 0.00021 |
| chr10 | 11615774  | 11615853  | 0.08 | 0.29212  | 0.00085 |
| chr10 | 11799636  | 11799667  | 0.03 | 0.35932  | 0       |
| chr10 | 16250844  | 16251115  | 0.27 | -0.32417 | 0       |
| chr10 | 16319997  | 16320001  | 0    | -0.34342 | 0       |
| chr10 | 16320541  | 16320652  | 0.11 | -0.32215 | 0       |
| chr10 | 18239805  | 18240316  | 0.51 | -0.28376 | 0.00042 |
| chr10 | 22622459  | 22622793  | 0.33 | 0.29805  | 0.00021 |
| chr10 | 22843607  | 22843938  | 0.33 | 0.30014  | 0.00021 |
| chr10 | 24738227  | 24738322  | 0.1  | 0.29708  | 0.00042 |
| chr10 | 29980953  | 29981216  | 0.26 | 0.31643  | 0       |
| chr10 | 30020120  | 30020140  | 0.02 | 0.37799  | 0       |
| chr10 | 34313874  | 34313965  | 0.09 | 0.29745  | 0.00021 |
| chr10 | 34391256  | 34391668  | 0.41 | 0.33184  | 0       |
| chr10 | 45923083  | 45923705  | 0.62 | 0.313    | 0       |
| chr10 | 50143375  | 50143509  | 0.13 | 0.31422  | 0       |
| chr10 | 60086738  | 60087111  | 0.37 | 0.34518  | 0       |
| chr10 | 64679758  | 64679766  | 0.01 | -0.30647 | 0       |
| chr10 | 64967241  | 64967610  | 0.37 | 0.33205  | 0       |
| chr10 | 65442289  | 65442359  | 0.07 | 0.30985  | 0       |
| chr10 | 70322442  | 70322874  | 0.43 | 0.30185  | 0.00021 |
| chr10 | 72454006  | 72454026  | 0.02 | 0.30647  | 0       |
| chr10 | 73272256  | 73272300  | 0.04 | -0.2987  | 0.00021 |
| chr10 | 73746656  | 73746786  | 0.13 | 0.33101  | 0       |
| chr10 | 79003155  | 79003508  | 0.35 | 0.3174   | 0       |
| chr10 | 93805441  | 93805682  | 0.24 | 0.30994  | 0       |
| chr10 | 94452311  | 94452554  | 0.24 | 0.30671  | 0       |
| chr10 | 98129751  | 98130310  | 0.56 | -0.40185 | 0       |
| chr10 | 99393873  | 99393886  | 0.01 | -0.323   | 0       |
| chr10 | 102496500 | 102496915 | 0.42 | 0.32507  | 0       |
| chr10 | 102642655 | 102642752 | 0.1  | 0.32814  | 0       |
| chr10 | 103698992 | 103699237 | 0.25 | 0.33738  | 0       |
| chr10 | 104905387 | 104905806 | 0.42 | 0.36249  | 0       |
| chr10 | 107292939 | 107292956 | 0.02 | -0.30326 | 0.00021 |
| chr10 | 109135976 | 109136178 | 0.2  | -0.30051 | 0.00021 |
| chr10 | 112723024 | 112723296 | 0.27 | 0.37043  | 0       |
| chr10 | 116335842 | 116336057 | 0.22 | 0.33732  | 0       |
| chr10 | 116367648 | 116367729 | 0.08 | 0.3293   | 0       |
| chr10 | 119291766 | 119292062 | 0.3  | 0.32089  | 0       |
| chr10 | 119292300 | 119292549 | 0.25 | 0.3047   | 0       |
| chr10 | 119293341 | 119293550 | 0.21 | 0.29061  | 0       |

|       |           |           |      |          |         |
|-------|-----------|-----------|------|----------|---------|
| chr10 | 120115553 | 120115780 | 0.23 | 0.29626  | 0.00064 |
| chr10 | 120429062 | 120429205 | 0.14 | 0.29269  | 0       |
| chr10 | 121300857 | 121301041 | 0.18 | -0.29804 | 0.00021 |
| chr10 | 124459311 | 124459513 | 0.2  | -0.28742 | 0.00021 |
| chr10 | 126392111 | 126392429 | 0.32 | 0.33157  | 0       |
| chr10 | 126635660 | 126636047 | 0.39 | 0.33866  | 0       |
| chr10 | 126782397 | 126782576 | 0.18 | 0.31502  | 0       |
| chr10 | 128607975 | 128608036 | 0.06 | 0.34435  | 0       |
| chr10 | 130124378 | 130124853 | 0.48 | -0.29408 | 0       |
| chr10 | 130185305 | 130185387 | 0.08 | -0.32493 | 0       |
| chr10 | 130201069 | 130201251 | 0.18 | -0.29206 | 0.00085 |
| chr10 | 130422176 | 130422194 | 0.02 | -0.30635 | 0       |
| chr10 | 130832268 | 130832393 | 0.13 | -0.33672 | 0       |
| chr10 | 131843725 | 131844548 | 0.82 | -0.29083 | 0       |
| chr10 | 132461246 | 132461281 | 0.04 | -0.30925 | 0       |
| chr10 | 132583721 | 132584219 | 0.5  | -0.31824 | 0       |
| chr10 | 132882986 | 132883127 | 0.14 | -0.34523 | 0       |
| chr10 | 132886634 | 132886739 | 0.11 | -0.27777 | 0.00042 |
| chr10 | 132891319 | 132891371 | 0.05 | -0.31701 | 0       |
| chr10 | 132891754 | 132892187 | 0.43 | -0.33938 | 0       |
| chr10 | 132897099 | 132897160 | 0.06 | -0.2985  | 0.00021 |
| chr10 | 132999672 | 132999707 | 0.04 | -0.30703 | 0       |
| chr10 | 133036065 | 133036108 | 0.04 | -0.34065 | 0       |
| chr10 | 133055449 | 133055651 | 0.2  | -0.31904 | 0       |
| chr10 | 133058901 | 133058988 | 0.09 | -0.3009  | 0.00021 |
| chr10 | 133208644 | 133208984 | 0.34 | -0.31429 | 0       |
| chr10 | 133317423 | 133318287 | 0.86 | -0.31571 | 0       |
| chr10 | 133508385 | 133508442 | 0.06 | -0.33827 | 0       |
| chr10 | 133598589 | 133598669 | 0.08 | -0.3737  | 0       |
| chr10 | 134143489 | 134143535 | 0.05 | -0.35662 | 0       |
| chr10 | 134144355 | 134144401 | 0.05 | -0.41011 | 0       |
| chr10 | 134334241 | 134334283 | 0.04 | 0.29443  | 0.00064 |
| chr10 | 134623278 | 134624055 | 0.78 | -0.30101 | 0       |
| chr10 | 134647690 | 134648115 | 0.43 | -0.30255 | 0       |
| chr10 | 134843768 | 134843775 | 0.01 | -0.33768 | 0       |
| chr10 | 134875720 | 134875916 | 0.2  | -0.36493 | 0       |
| chr10 | 134977297 | 134978147 | 0.85 | -0.31842 | 0       |
| chr10 | 134994424 | 134994945 | 0.52 | -0.30108 | 0       |
| chr10 | 134996789 | 134996895 | 0.11 | -0.36726 | 0       |
| chr10 | 135002718 | 135002976 | 0.26 | -0.29733 | 0       |
| chr10 | 135012454 | 135012575 | 0.12 | -0.32647 | 0       |
| chr10 | 135017785 | 135018992 | 1.21 | -0.35897 | 0       |
| chr10 | 135020931 | 135021100 | 0.17 | -0.29938 | 0       |
| chr10 | 135030513 | 135030554 | 0.04 | -0.29316 | 0.00085 |
| chr10 | 135039948 | 135040250 | 0.3  | -0.36168 | 0       |
| chr10 | 135123006 | 135123337 | 0.33 | -0.32563 | 0       |
| chr10 | 135153937 | 135153972 | 0.04 | -0.35584 | 0       |

|       |          |          |      |          |         |
|-------|----------|----------|------|----------|---------|
| chr11 | 460587   | 460914   | 0.33 | -0.28344 | 0.00042 |
| chr11 | 1321929  | 1321954  | 0.03 | 0.33748  | 0       |
| chr11 | 2705153  | 2705357  | 0.2  | 0.3005   | 0.00021 |
| chr11 | 4928572  | 4928579  | 0.01 | -0.31662 | 0       |
| chr11 | 5129538  | 5129836  | 0.3  | -0.29131 | 0       |
| chr11 | 5264613  | 5265215  | 0.6  | -0.29536 | 0       |
| chr11 | 5346163  | 5346556  | 0.39 | -0.29703 | 0       |
| chr11 | 5372087  | 5372944  | 0.86 | -0.30668 | 0       |
| chr11 | 5951048  | 5951433  | 0.39 | -0.36123 | 0       |
| chr11 | 6518438  | 6518792  | 0.35 | 0.31027  | 0       |
| chr11 | 8653170  | 8653329  | 0.16 | 0.30482  | 0.00021 |
| chr11 | 8705790  | 8705801  | 0.01 | -0.31484 | 0       |
| chr11 | 10750870 | 10750890 | 0.02 | 0.43749  | 0       |
| chr11 | 11994913 | 11995462 | 0.55 | 0.28402  | 0.00042 |
| chr11 | 12180609 | 12180973 | 0.36 | 0.3851   | 0       |
| chr11 | 12182350 | 12182377 | 0.03 | 0.29185  | 0.00085 |
| chr11 | 12875566 | 12875633 | 0.07 | 0.35405  | 0       |
| chr11 | 13983009 | 13983851 | 0.84 | -0.30637 | 0       |
| chr11 | 31818474 | 31818791 | 0.32 | 0.29299  | 0.00085 |
| chr11 | 35019666 | 35019673 | 0.01 | 0.34068  | 0       |
| chr11 | 35704400 | 35704643 | 0.24 | 0.31999  | 0       |
| chr11 | 35834513 | 35834595 | 0.08 | 0.34847  | 0       |
| chr11 | 36184661 | 36184683 | 0.02 | 0.35358  | 0       |
| chr11 | 43945505 | 43945562 | 0.06 | 0.30864  | 0       |
| chr11 | 45070809 | 45070822 | 0.01 | 0.3364   | 0       |
| chr11 | 47510560 | 47510670 | 0.11 | 0.29204  | 0.00085 |
| chr11 | 55587090 | 55587104 | 0.01 | -0.30713 | 0       |
| chr11 | 55796741 | 55797190 | 0.45 | -0.29856 | 0.00021 |
| chr11 | 55798206 | 55798258 | 0.05 | -0.30901 | 0       |
| chr11 | 56141829 | 56141860 | 0.03 | -0.30587 | 0       |
| chr11 | 56466578 | 56466770 | 0.19 | -0.28    | 0.00042 |
| chr11 | 56510971 | 56511248 | 0.28 | -0.3078  | 0       |
| chr11 | 59823508 | 59823993 | 0.49 | -0.30888 | 0       |
| chr11 | 59929200 | 59929511 | 0.31 | -0.29786 | 0.00021 |
| chr11 | 60282398 | 60282420 | 0.02 | -0.29744 | 0.00021 |
| chr11 | 60282712 | 60282742 | 0.03 | -0.30208 | 0.00021 |
| chr11 | 61159047 | 61159083 | 0.04 | -0.31233 | 0       |
| chr11 | 62303750 | 62304165 | 0.42 | 0.3343   | 0       |
| chr11 | 64097027 | 64097101 | 0.07 | 0.29227  | 0       |
| chr11 | 64322890 | 64323247 | 0.36 | 0.33019  | 0       |
| chr11 | 64863232 | 64863373 | 0.14 | 0.30388  | 0.00021 |
| chr11 | 64871778 | 64871888 | 0.11 | 0.41911  | 0       |
| chr11 | 68782049 | 68782202 | 0.15 | 0.30113  | 0       |
| chr11 | 68853915 | 68853957 | 0.04 | 0.35014  | 0       |
| chr11 | 69706285 | 69706527 | 0.24 | -0.3171  | 0       |
| chr11 | 69706831 | 69706901 | 0.07 | -0.29651 | 0.00042 |
| chr11 | 69707303 | 69707384 | 0.08 | -0.38261 | 0       |



|       |           |           |      |          |         |
|-------|-----------|-----------|------|----------|---------|
| chr11 | 69949774  | 69950073  | 0.3  | 0.30387  | 0.00021 |
| chr11 | 70210616  | 70210622  | 0.01 | 0.34191  | 0       |
| chr11 | 70289549  | 70289583  | 0.03 | -0.28669 | 0.00021 |
| chr11 | 72019825  | 72019901  | 0.08 | 0.3534   | 0       |
| chr11 | 76474735  | 76474788  | 0.05 | 0.31244  | 0       |
| chr11 | 86105255  | 86105321  | 0.07 | 0.30222  | 0.00021 |
| chr11 | 102702285 | 102702414 | 0.13 | 0.29191  | 0.00085 |
| chr11 | 105590209 | 105590390 | 0.18 | -0.34369 | 0       |
| chr11 | 113244828 | 113245069 | 0.24 | 0.32022  | 0       |
| chr11 | 118657127 | 118657363 | 0.24 | 0.3076   | 0       |
| chr11 | 119524154 | 119524243 | 0.09 | -0.31703 | 0       |
| chr11 | 120618705 | 120618722 | 0.02 | 0.29563  | 0.00064 |
| chr11 | 120998006 | 120998811 | 0.81 | -0.33062 | 0       |
| chr11 | 121208950 | 121208989 | 0.04 | 0.40174  | 0       |
| chr11 | 121365540 | 121365727 | 0.19 | 0.29183  | 0.00085 |
| chr11 | 122655631 | 122655638 | 0.01 | 0.41752  | 0       |
| chr11 | 123885349 | 123885695 | 0.35 | -0.32275 | 0       |
| chr11 | 124506014 | 124506266 | 0.25 | 0.32314  | 0       |
| chr11 | 125801456 | 125801519 | 0.06 | 0.35433  | 0       |
| chr11 | 129145940 | 129145951 | 0.01 | 0.32753  | 0       |
| chr11 | 131778850 | 131779255 | 0.41 | -0.35213 | 0       |
| chr11 | 131799287 | 131799701 | 0.41 | -0.28823 | 0       |
| chr11 | 132016192 | 132016295 | 0.1  | -0.33954 | 0       |
| chr11 | 132080258 | 132080630 | 0.37 | -0.35354 | 0       |
| chr11 | 132107419 | 132107534 | 0.12 | -0.3718  | 0       |
| chr11 | 132177605 | 132177693 | 0.09 | -0.28308 | 0.00042 |
| chr11 | 132394504 | 132394991 | 0.49 | -0.32609 | 0       |
| chr11 | 132526947 | 132527438 | 0.49 | -0.33377 | 0       |
| chr11 | 134783448 | 134783504 | 0.06 | -0.30586 | 0       |
| chr12 | 272635    | 272745    | 0.11 | -0.32286 | 0       |
| chr12 | 2082146   | 2082218   | 0.07 | 0.35185  | 0       |
| chr12 | 2968001   | 2968215   | 0.21 | 0.31883  | 0       |
| chr12 | 3011514   | 3011741   | 0.23 | 0.35525  | 0       |
| chr12 | 3361896   | 3361996   | 0.1  | 0.29734  | 0.00021 |
| chr12 | 6501933   | 6501960   | 0.03 | 0.31066  | 0       |
| chr12 | 6665335   | 6665424   | 0.09 | 0.28593  | 0.00021 |
| chr12 | 7858592   | 7858598   | 0.01 | -0.29359 | 0.00064 |
| chr12 | 7942353   | 7942817   | 0.46 | 0.35483  | 0       |
| chr12 | 8025394   | 8025435   | 0.04 | 0.3192   | 0       |
| chr12 | 8025646   | 8025756   | 0.11 | 0.31074  | 0       |
| chr12 | 9478612   | 9478906   | 0.29 | 0.29643  | 0       |
| chr12 | 11877740  | 11878017  | 0.28 | 0.30578  | 0       |
| chr12 | 12659177  | 12659685  | 0.51 | 0.31062  | 0       |
| chr12 | 13132607  | 13132661  | 0.05 | 0.29406  | 0.00064 |
| chr12 | 15782193  | 15782294  | 0.1  | 0.31403  | 0       |
| chr12 | 16034055  | 16034100  | 0.05 | -0.30947 | 0       |
| chr12 | 16762789  | 16762843  | 0.05 | 0.30452  | 0       |

|       |           |           |      |          |         |
|-------|-----------|-----------|------|----------|---------|
| chr12 | 16942296  | 16942300  | 0    | 0.33175  | 0       |
| chr12 | 18890833  | 18890872  | 0.04 | -0.31701 | 0       |
| chr12 | 19358223  | 19358289  | 0.07 | 0.39727  | 0       |
| chr12 | 26038809  | 26038924  | 0.12 | -0.33191 | 0       |
| chr12 | 32825282  | 32825307  | 0.03 | 0.36125  | 0       |
| chr12 | 34474362  | 34474637  | 0.28 | -0.31912 | 0       |
| chr12 | 34488729  | 34488830  | 0.1  | -0.3734  | 0       |
| chr12 | 34494825  | 34494852  | 0.03 | -0.37965 | 0       |
| chr12 | 42628974  | 42629138  | 0.16 | 0.54352  | 0       |
| chr12 | 46776389  | 46776425  | 0.04 | -0.2929  | 0.00085 |
| chr12 | 46855182  | 46855622  | 0.44 | 0.32578  | 0       |
| chr12 | 50528616  | 50528754  | 0.14 | 0.3911   | 0       |
| chr12 | 51421225  | 51421367  | 0.14 | -0.34544 | 0       |
| chr12 | 52652377  | 52652462  | 0.09 | 0.29368  | 0.00064 |
| chr12 | 53995468  | 53995504  | 0.04 | 0.33272  | 0       |
| chr12 | 57735981  | 57736363  | 0.38 | 0.30699  | 0       |
| chr12 | 64687265  | 64687325  | 0.06 | -0.34168 | 0       |
| chr12 | 66220754  | 66220810  | 0.06 | -0.39799 | 0       |
| chr12 | 69236712  | 69236811  | 0.1  | 0.32827  | 0       |
| chr12 | 69752753  | 69753119  | 0.37 | -0.2954  | 0       |
| chr12 | 89033255  | 89033280  | 0.03 | 0.30005  | 0.00021 |
| chr12 | 91572191  | 91572199  | 0.01 | 0.30784  | 0       |
| chr12 | 93396260  | 93396759  | 0.5  | 0.3247   | 0       |
| chr12 | 94131844  | 94131957  | 0.11 | 0.37833  | 0       |
| chr12 | 94208017  | 94208276  | 0.26 | 0.39482  | 0       |
| chr12 | 95945384  | 95945610  | 0.23 | 0.2927   | 0       |
| chr12 | 96350720  | 96350795  | 0.08 | 0.33857  | 0       |
| chr12 | 96633384  | 96633723  | 0.34 | 0.344    | 0       |
| chr12 | 103633300 | 103633338 | 0.04 | -0.3181  | 0       |
| chr12 | 104194358 | 104194370 | 0.01 | 0.32204  | 0       |
| chr12 | 105065028 | 105065386 | 0.36 | -0.34545 | 0       |
| chr12 | 105626937 | 105627190 | 0.25 | 0.306    | 0       |
| chr12 | 109896495 | 109897234 | 0.74 | 0.29827  | 0       |
| chr12 | 110172208 | 110172346 | 0.14 | 0.30208  | 0       |
| chr12 | 111926384 | 111926423 | 0.04 | 0.31357  | 0       |
| chr12 | 113916609 | 113916664 | 0.06 | 0.36477  | 0       |
| chr12 | 114513507 | 114513561 | 0.05 | -0.31796 | 0       |
| chr12 | 118627943 | 118628449 | 0.51 | 0.31582  | 0       |
| chr12 | 119086607 | 119086637 | 0.03 | -0.32737 | 0       |
| chr12 | 119213093 | 119213160 | 0.07 | -0.35121 | 0       |
| chr12 | 119213900 | 119214021 | 0.12 | -0.38193 | 0       |
| chr12 | 119346888 | 119347315 | 0.43 | -0.29845 | 0.00021 |
| chr12 | 120242394 | 120242513 | 0.12 | 0.28002  | 0.00042 |
| chr12 | 120687694 | 120688060 | 0.37 | 0.31969  | 0       |
| chr12 | 122764418 | 122764545 | 0.13 | 0.32327  | 0       |
| chr12 | 123930117 | 123930124 | 0.01 | 0.33883  | 0       |
| chr12 | 124811985 | 124812154 | 0.17 | 0.46561  | 0       |

|       |           |           |      |          |         |
|-------|-----------|-----------|------|----------|---------|
| chr12 | 126926911 | 126926925 | 0.01 | -0.29364 | 0.00064 |
| chr12 | 128245593 | 128245658 | 0.07 | -0.27563 | 0.00042 |
| chr12 | 128602715 | 128602780 | 0.07 | -0.30894 | 0       |
| chr12 | 129594978 | 129595394 | 0.42 | -0.33357 | 0       |
| chr12 | 130183692 | 130184190 | 0.5  | -0.31238 | 0       |
| chr12 | 130184740 | 130185259 | 0.52 | -0.31199 | 0       |
| chr12 | 130333815 | 130334009 | 0.19 | -0.35043 | 0       |
| chr12 | 130335340 | 130335752 | 0.41 | -0.33569 | 0       |
| chr12 | 130337265 | 130337671 | 0.41 | -0.32256 | 0       |
| chr12 | 130420637 | 130420666 | 0.03 | -0.31985 | 0       |
| chr12 | 130958711 | 130958790 | 0.08 | -0.29879 | 0.00021 |
| chr12 | 131417943 | 131418217 | 0.27 | -0.31627 | 0       |
| chr12 | 132677496 | 132677645 | 0.15 | -0.30021 | 0.00021 |
| chr12 | 132863782 | 132863983 | 0.2  | -0.36329 | 0       |
| chr12 | 132880790 | 132881276 | 0.49 | -0.41172 | 0       |
| chr12 | 132983481 | 132983814 | 0.33 | -0.308   | 0       |
| chr12 | 133345285 | 133345322 | 0.04 | 0.30293  | 0.00021 |
| chr13 | 25085301  | 25085669  | 0.37 | -0.43225 | 0       |
| chr13 | 25668392  | 25668714  | 0.32 | -0.32648 | 0       |
| chr13 | 28545214  | 28545295  | 0.08 | 0.35827  | 0       |
| chr13 | 30951587  | 30952016  | 0.43 | 0.43204  | 0       |
| chr13 | 30963379  | 30963558  | 0.18 | 0.30837  | 0       |
| chr13 | 31456352  | 31456604  | 0.25 | 0.33342  | 0       |
| chr13 | 39989296  | 39989389  | 0.09 | 0.29669  | 0.00042 |
| chr13 | 41594472  | 41594509  | 0.04 | 0.34763  | 0       |
| chr13 | 43727819  | 43727984  | 0.17 | -0.39427 | 0       |
| chr13 | 45781178  | 45781603  | 0.43 | 0.29533  | 0.00064 |
| chr13 | 47161167  | 47161752  | 0.59 | 0.37069  | 0       |
| chr13 | 48986750  | 48987465  | 0.72 | 0.38209  | 0       |
| chr13 | 50702410  | 50702675  | 0.27 | 0.31331  | 0       |
| chr13 | 50702795  | 50703477  | 0.68 | 0.31058  | 0       |
| chr13 | 50706810  | 50706830  | 0.02 | 0.30513  | 0.00021 |
| chr13 | 100783450 | 100783618 | 0.17 | 0.39331  | 0       |
| chr13 | 108234261 | 108234701 | 0.44 | -0.29658 | 0.00042 |
| chr13 | 111215148 | 111215290 | 0.14 | -0.42531 | 0       |
| chr13 | 111892737 | 111892794 | 0.06 | 0.32097  | 0       |
| chr13 | 112236782 | 112236854 | 0.07 | -0.30283 | 0.00021 |
| chr13 | 112335939 | 112336027 | 0.09 | -0.30447 | 0.00021 |
| chr13 | 112554122 | 112554252 | 0.13 | -0.31436 | 0       |
| chr13 | 112555823 | 112555972 | 0.15 | -0.31148 | 0       |
| chr13 | 112624688 | 112624791 | 0.1  | -0.28508 | 0.00042 |
| chr13 | 112690122 | 112690517 | 0.4  | -0.3056  | 0       |
| chr13 | 112692119 | 112692270 | 0.15 | -0.343   | 0       |
| chr13 | 112759355 | 112759719 | 0.36 | 0.29076  | 0       |
| chr13 | 112899567 | 112899619 | 0.05 | -0.32632 | 0       |
| chr13 | 112901907 | 112901929 | 0.02 | -0.30658 | 0       |
| chr13 | 112903693 | 112904449 | 0.76 | -0.28508 | 0       |

|       |           |           |      |          |         |
|-------|-----------|-----------|------|----------|---------|
| chr13 | 112906400 | 112906711 | 0.31 | -0.27538 | 0.00064 |
| chr13 | 113556144 | 113556486 | 0.34 | 0.33712  | 0       |
| chr13 | 113622038 | 113622102 | 0.06 | -0.30034 | 0.00021 |
| chr13 | 113648767 | 113648892 | 0.13 | -0.38002 | 0       |
| chr13 | 113649513 | 113649600 | 0.09 | -0.29487 | 0.00064 |
| chr13 | 113719136 | 113719172 | 0.04 | -0.43732 | 0       |
| chr13 | 113763037 | 113763122 | 0.09 | -0.34811 | 0       |
| chr13 | 113776873 | 113776964 | 0.09 | 0.34279  | 0       |
| chr13 | 114056351 | 114056576 | 0.23 | -0.29373 | 0.00064 |
| chr13 | 114150007 | 114150139 | 0.13 | 0.27854  | 0.00042 |
| chr14 | 21502873  | 21503144  | 0.27 | 0.30028  | 0.00021 |
| chr14 | 23624778  | 23624788  | 0.01 | 0.32034  | 0       |
| chr14 | 23706743  | 23706751  | 0.01 | -0.31247 | 0       |
| chr14 | 25597490  | 25597562  | 0.07 | 0.38366  | 0       |
| chr14 | 32836157  | 32836446  | 0.29 | 0.31606  | 0       |
| chr14 | 38727014  | 38727024  | 0.01 | -0.30685 | 0       |
| chr14 | 39703160  | 39703302  | 0.14 | 0.32228  | 0       |
| chr14 | 45711848  | 45712025  | 0.18 | 0.46354  | 0       |
| chr14 | 50559902  | 50560100  | 0.2  | 0.33906  | 0       |
| chr14 | 50809390  | 50809588  | 0.2  | 0.33669  | 0       |
| chr14 | 51290136  | 51290662  | 0.53 | 0.35392  | 0       |
| chr14 | 52066950  | 52067152  | 0.2  | 0.41985  | 0       |
| chr14 | 53256600  | 53256914  | 0.31 | -0.35729 | 0       |
| chr14 | 55153114  | 55153130  | 0.02 | 0.31899  | 0       |
| chr14 | 55603874  | 55603957  | 0.08 | 0.36005  | 0       |
| chr14 | 55707715  | 55707866  | 0.15 | 0.41087  | 0       |
| chr14 | 57197411  | 57197764  | 0.35 | 0.30684  | 0       |
| chr14 | 61108227  | 61108807  | 0.58 | 0.28024  | 0.00042 |
| chr14 | 62009941  | 62010028  | 0.09 | 0.33387  | 0       |
| chr14 | 64663864  | 64663928  | 0.06 | 0.34004  | 0       |
| chr14 | 68978814  | 68979049  | 0.24 | 0.3083   | 0       |
| chr14 | 68991156  | 68991371  | 0.22 | 0.35097  | 0       |
| chr14 | 69052728  | 69052740  | 0.01 | 0.36947  | 0       |
| chr14 | 69523223  | 69523229  | 0.01 | 0.36382  | 0       |
| chr14 | 69754092  | 69754550  | 0.46 | 0.29539  | 0.00064 |
| chr14 | 72053177  | 72053361  | 0.18 | 0.29509  | 0.00064 |
| chr14 | 73146054  | 73146637  | 0.58 | 0.3706   | 0       |
| chr14 | 73168082  | 73168188  | 0.11 | 0.29509  | 0.00064 |
| chr14 | 73209128  | 73209188  | 0.06 | 0.31975  | 0       |
| chr14 | 74257107  | 74257363  | 0.26 | 0.32917  | 0       |
| chr14 | 74815085  | 74815131  | 0.05 | 0.33888  | 0       |
| chr14 | 75704448  | 75704839  | 0.39 | 0.30972  | 0       |
| chr14 | 76309091  | 76309157  | 0.07 | 0.37898  | 0       |
| chr14 | 76445988  | 76446433  | 0.45 | 0.28255  | 0.00021 |
| chr14 | 78021544  | 78021636  | 0.09 | 0.27509  | 0.00064 |
| chr14 | 88502488  | 88502687  | 0.2  | -0.29416 | 0       |
| chr14 | 89817792  | 89818474  | 0.68 | 0.29412  | 0       |

|       |           |           |      |          |         |
|-------|-----------|-----------|------|----------|---------|
| chr14 | 94812770  | 94812826  | 0.06 | -0.30254 | 0.00021 |
| chr14 | 95078599  | 95078743  | 0.14 | 0.30058  | 0       |
| chr14 | 96752011  | 96752231  | 0.22 | 0.31128  | 0       |
| chr14 | 96967437  | 96967681  | 0.24 | -0.32107 | 0       |
| chr14 | 97262709  | 97262871  | 0.16 | -0.34276 | 0       |
| chr14 | 101155305 | 101155658 | 0.35 | -0.2987  | 0       |
| chr14 | 102027660 | 102027681 | 0.02 | 0.28619  | 0       |
| chr14 | 103871225 | 103871452 | 0.23 | 0.40647  | 0       |
| chr14 | 104896488 | 104897068 | 0.58 | -0.31045 | 0       |
| chr14 | 105512213 | 105512306 | 0.09 | 0.2947   | 0       |
| chr14 | 106173575 | 106173722 | 0.15 | -0.2925  | 0.00085 |
| chr14 | 106198003 | 106198034 | 0.03 | -0.29776 | 0.00021 |
| chr15 | 31355304  | 31355362  | 0.06 | 0.31131  | 0       |
| chr15 | 39458978  | 39459285  | 0.31 | 0.31139  | 0       |
| chr15 | 40225341  | 40225618  | 0.28 | -0.29621 | 0.00064 |
| chr15 | 42749336  | 42749885  | 0.55 | 0.37267  | 0       |
| chr15 | 42800679  | 42800833  | 0.15 | 0.36688  | 0       |
| chr15 | 45005363  | 45005365  | 0    | -0.32956 | 0       |
| chr15 | 49715342  | 49715415  | 0.07 | 0.2928   | 0.00085 |
| chr15 | 49716247  | 49716645  | 0.4  | 0.34893  | 0       |
| chr15 | 52433022  | 52433433  | 0.41 | 0.31406  | 0       |
| chr15 | 57029040  | 57029050  | 0.01 | 0.29362  | 0.00064 |
| chr15 | 57510575  | 57510606  | 0.03 | 0.3146   | 0       |
| chr15 | 59500970  | 59501408  | 0.44 | 0.29727  | 0       |
| chr15 | 60285691  | 60285821  | 0.13 | 0.30959  | 0       |
| chr15 | 60817947  | 60818455  | 0.51 | 0.27963  | 0.00042 |
| chr15 | 61210082  | 61210235  | 0.15 | 0.32136  | 0       |
| chr15 | 63358260  | 63358672  | 0.41 | 0.38204  | 0       |
| chr15 | 64218300  | 64218534  | 0.23 | 0.30855  | 0       |
| chr15 | 64795954  | 64796240  | 0.29 | 0.31768  | 0       |
| chr15 | 65053605  | 65053614  | 0.01 | 0.29678  | 0.00042 |
| chr15 | 70613427  | 70613797  | 0.37 | 0.30531  | 0       |
| chr15 | 71389060  | 71389252  | 0.19 | 0.31143  | 0       |
| chr15 | 74508376  | 74508523  | 0.15 | -0.34275 | 0       |
| chr15 | 77518882  | 77519170  | 0.29 | 0.31882  | 0       |
| chr15 | 85330779  | 85330888  | 0.11 | 0.34431  | 0       |
| chr15 | 85396292  | 85396513  | 0.22 | 0.44229  | 0       |
| chr15 | 86215274  | 86215313  | 0.04 | 0.31817  | 0       |
| chr15 | 86232932  | 86233220  | 0.29 | 0.3188   | 0       |
| chr15 | 90388953  | 90389012  | 0.06 | -0.32918 | 0       |
| chr15 | 97345353  | 97345395  | 0.04 | -0.30158 | 0.00021 |
| chr15 | 101419275 | 101419333 | 0.06 | -0.30456 | 0       |
| chr16 | 1077597   | 1077624   | 0.03 | -0.32819 | 0       |
| chr16 | 1213672   | 1213919   | 0.25 | -0.29366 | 0       |
| chr16 | 1226269   | 1226302   | 0.03 | -0.3047  | 0.00021 |
| chr16 | 1245599   | 1245967   | 0.37 | -0.30833 | 0       |
| chr16 | 1271153   | 1272275   | 1.12 | -0.30841 | 0       |

|       |          |          |      |          |         |
|-------|----------|----------|------|----------|---------|
| chr16 | 3149381  | 3149397  | 0.02 | 0.29385  | 0.00064 |
| chr16 | 4289417  | 4289924  | 0.51 | 0.32698  | 0       |
| chr16 | 5488787  | 5488843  | 0.06 | -0.33425 | 0       |
| chr16 | 5812000  | 5812252  | 0.25 | -0.3024  | 0.00021 |
| chr16 | 7949631  | 7949659  | 0.03 | -0.30368 | 0.00021 |
| chr16 | 11828669 | 11828819 | 0.15 | 0.40837  | 0       |
| chr16 | 11886550 | 11886668 | 0.12 | 0.38502  | 0       |
| chr16 | 12010646 | 12010867 | 0.22 | -0.35007 | 0       |
| chr16 | 14029456 | 14029472 | 0.02 | 0.39987  | 0       |
| chr16 | 14280183 | 14280709 | 0.53 | 0.34546  | 0       |
| chr16 | 15488936 | 15489190 | 0.25 | -0.30791 | 0       |
| chr16 | 16181015 | 16181129 | 0.11 | 0.32698  | 0       |
| chr16 | 17609453 | 17609605 | 0.15 | -0.33802 | 0       |
| chr16 | 18939106 | 18939180 | 0.07 | -0.33348 | 0       |
| chr16 | 21012796 | 21012810 | 0.01 | 0.33054  | 0       |
| chr16 | 22082727 | 22082857 | 0.13 | 0.36992  | 0       |
| chr16 | 22296661 | 22296770 | 0.11 | 0.29658  | 0.00042 |
| chr16 | 23153611 | 23153792 | 0.18 | 0.31215  | 0       |
| chr16 | 27733016 | 27733133 | 0.12 | 0.33248  | 0       |
| chr16 | 28224134 | 28224204 | 0.07 | -0.3695  | 0       |
| chr16 | 28635358 | 28635374 | 0.02 | -0.35345 | 0       |
| chr16 | 30456325 | 30456379 | 0.05 | -0.3313  | 0       |
| chr16 | 34741251 | 34741304 | 0.05 | -0.33015 | 0       |
| chr16 | 48277559 | 48277630 | 0.07 | -0.3489  | 0       |
| chr16 | 50403396 | 50403566 | 0.17 | 0.31198  | 0       |
| chr16 | 67978429 | 67978450 | 0.02 | 0.303    | 0       |
| chr16 | 69385547 | 69385827 | 0.28 | 0.30955  | 0       |
| chr16 | 69832592 | 69832614 | 0.02 | 0.32089  | 0       |
| chr16 | 69872614 | 69873116 | 0.5  | 0.29172  | 0       |
| chr16 | 72232102 | 72232644 | 0.54 | 0.34033  | 0       |
| chr16 | 76342377 | 76342620 | 0.24 | -0.3174  | 0       |
| chr16 | 78276006 | 78276299 | 0.29 | 0.30986  | 0       |
| chr16 | 81271013 | 81271267 | 0.25 | 0.3      | 0.00021 |
| chr16 | 82608833 | 82609548 | 0.72 | -0.29679 | 0       |
| chr16 | 83519231 | 83519418 | 0.19 | -0.29273 | 0.00085 |
| chr16 | 84828913 | 84829007 | 0.09 | 0.30751  | 0       |
| chr16 | 85063708 | 85063787 | 0.08 | -0.35495 | 0       |
| chr16 | 88164417 | 88164581 | 0.16 | -0.33632 | 0       |
| chr16 | 88949367 | 88949579 | 0.21 | -0.30761 | 0       |
| chr17 | 579682   | 579774   | 0.09 | 0.36788  | 0       |
| chr17 | 762510   | 763049   | 0.54 | 0.32366  | 0       |
| chr17 | 800263   | 800431   | 0.17 | 0.34332  | 0       |
| chr17 | 873255   | 873619   | 0.36 | 0.33916  | 0       |
| chr17 | 1063892  | 1064017  | 0.13 | -0.30153 | 0       |
| chr17 | 2075719  | 2076468  | 0.75 | 0.33183  | 0       |
| chr17 | 2140096  | 2140270  | 0.17 | 0.30313  | 0.00021 |
| chr17 | 3377350  | 3377797  | 0.45 | 0.30273  | 0.00021 |

|       |          |          |      |          |         |
|-------|----------|----------|------|----------|---------|
| chr17 | 3716279  | 3716558  | 0.28 | -0.30329 | 0       |
| chr17 | 4108050  | 4108148  | 0.1  | 0.31706  | 0       |
| chr17 | 4648682  | 4649076  | 0.39 | 0.30781  | 0       |
| chr17 | 15522859 | 15522897 | 0.04 | 0.38251  | 0       |
| chr17 | 16978535 | 16978673 | 0.14 | 0.30137  | 0.00021 |
| chr17 | 17024192 | 17024437 | 0.25 | 0.29517  | 0.00064 |
| chr17 | 18647507 | 18647524 | 0.02 | 0.36466  | 0       |
| chr17 | 26500010 | 26500086 | 0.08 | 0.32811  | 0       |
| chr17 | 30873196 | 30873447 | 0.25 | 0.36766  | 0       |
| chr17 | 33823619 | 33823690 | 0.07 | 0.35222  | 0       |
| chr17 | 33842255 | 33842301 | 0.05 | 0.32666  | 0       |
| chr17 | 35423405 | 35423449 | 0.04 | 0.29254  | 0.00085 |
| chr17 | 37216789 | 37216821 | 0.03 | 0.32674  | 0       |
| chr17 | 38182487 | 38182512 | 0.03 | 0.29852  | 0.00021 |
| chr17 | 46700424 | 46700449 | 0.03 | 0.29302  | 0.00085 |
| chr17 | 46707338 | 46707781 | 0.44 | 0.32068  | 0       |
| chr17 | 46709858 | 46710112 | 0.25 | 0.3077   | 0       |
| chr17 | 48276255 | 48276347 | 0.09 | 0.29944  | 0.00021 |
| chr17 | 57505491 | 57505597 | 0.11 | 0.3654   | 0       |
| chr17 | 58216297 | 58216415 | 0.12 | 0.31551  | 0       |
| chr17 | 60884617 | 60885154 | 0.54 | -0.30905 | 0       |
| chr17 | 61476730 | 61476846 | 0.12 | 0.34751  | 0       |
| chr17 | 63070811 | 63071046 | 0.24 | 0.33936  | 0       |
| chr17 | 64226823 | 64227024 | 0.2  | 0.32419  | 0       |
| chr17 | 72620022 | 72620058 | 0.04 | -0.32421 | 0       |
| chr17 | 72666418 | 72666670 | 0.25 | -0.31659 | 0       |
| chr17 | 73128545 | 73128575 | 0.03 | -0.31823 | 0       |
| chr17 | 73955611 | 73955839 | 0.23 | 0.42589  | 0       |
| chr17 | 74641167 | 74641294 | 0.13 | 0.28933  | 0       |
| chr17 | 74868604 | 74868693 | 0.09 | -0.27869 | 0.00042 |
| chr17 | 75882353 | 75882609 | 0.26 | -0.32148 | 0       |
| chr17 | 76183632 | 76183641 | 0.01 | -0.32298 | 0       |
| chr17 | 76220608 | 76220955 | 0.35 | 0.34799  | 0       |
| chr17 | 77997922 | 77997997 | 0.08 | 0.33927  | 0       |
| chr17 | 79010831 | 79011140 | 0.31 | -0.27176 | 0.00085 |
| chr17 | 79380493 | 79380515 | 0.02 | -0.30977 | 0       |
| chr17 | 79381472 | 79381734 | 0.26 | -0.32279 | 0       |
| chr17 | 79388690 | 79388814 | 0.12 | -0.2918  | 0.00085 |
| chr17 | 79412681 | 79412788 | 0.11 | -0.43859 | 0       |
| chr17 | 79414215 | 79415034 | 0.82 | -0.30325 | 0       |
| chr17 | 79416203 | 79416550 | 0.35 | -0.32541 | 0       |
| chr17 | 79419796 | 79420145 | 0.35 | -0.35596 | 0       |
| chr17 | 79420279 | 79420436 | 0.16 | -0.29113 | 0       |
| chr17 | 79425877 | 79426049 | 0.17 | -0.32917 | 0       |
| chr17 | 79426353 | 79426432 | 0.08 | -0.32359 | 0       |
| chr17 | 79495664 | 79496290 | 0.63 | -0.32357 | 0       |
| chr17 | 80289437 | 80290106 | 0.67 | -0.30644 | 0       |

|       |          |          |      |          |         |
|-------|----------|----------|------|----------|---------|
| chr17 | 80346849 | 80346912 | 0.06 | -0.2963  | 0.00064 |
| chr17 | 80627720 | 80627886 | 0.17 | 0.32829  | 0       |
| chr17 | 80839243 | 80839375 | 0.13 | 0.35003  | 0       |
| chr17 | 81006524 | 81006821 | 0.3  | -0.30029 | 0.00021 |
| chr18 | 3874746  | 3874883  | 0.14 | 0.30203  | 0.00021 |
| chr18 | 5133855  | 5133933  | 0.08 | -0.34986 | 0       |
| chr18 | 5420951  | 5421105  | 0.15 | -0.33973 | 0       |
| chr18 | 10588980 | 10589360 | 0.38 | -0.39059 | 0       |
| chr18 | 20911287 | 20911360 | 0.07 | -0.29931 | 0       |
| chr18 | 33198928 | 33198945 | 0.02 | 0.38279  | 0       |
| chr18 | 44775558 | 44775561 | 0    | 0.30355  | 0.00021 |
| chr18 | 52627127 | 52627333 | 0.21 | -0.32995 | 0       |
| chr18 | 56296334 | 56296354 | 0.02 | 0.27317  | 0.00064 |
| chr18 | 74199185 | 74199233 | 0.05 | 0.31888  | 0       |
| chr18 | 75691297 | 75691425 | 0.13 | -0.38336 | 0       |
| chr18 | 75795498 | 75795691 | 0.19 | -0.32493 | 0       |
| chr18 | 75796593 | 75796626 | 0.03 | -0.32763 | 0       |
| chr18 | 76073399 | 76073557 | 0.16 | -0.31392 | 0       |
| chr18 | 76122391 | 76122611 | 0.22 | -0.2946  | 0.00064 |
| chr18 | 76260265 | 76260974 | 0.71 | -0.31089 | 0       |
| chr18 | 76304359 | 76304376 | 0.02 | -0.31916 | 0       |
| chr18 | 76400706 | 76401126 | 0.42 | -0.37347 | 0       |
| chr18 | 76445954 | 76446282 | 0.33 | -0.33788 | 0       |
| chr18 | 76477920 | 76478007 | 0.09 | -0.29992 | 0.00021 |
| chr18 | 76486314 | 76486611 | 0.3  | -0.3202  | 0       |
| chr18 | 76601647 | 76601755 | 0.11 | -0.32899 | 0       |
| chr18 | 76636062 | 76636159 | 0.1  | -0.31776 | 0       |
| chr18 | 76767645 | 76767684 | 0.04 | -0.36048 | 0       |
| chr19 | 1325931  | 1326119  | 0.19 | -0.309   | 0       |
| chr19 | 1851882  | 1851995  | 0.11 | 0.31019  | 0       |
| chr19 | 2095466  | 2095643  | 0.18 | -0.29353 | 0       |
| chr19 | 3383483  | 3383726  | 0.24 | 0.30702  | 0       |
| chr19 | 3917900  | 3917955  | 0.06 | -0.32707 | 0       |
| chr19 | 4555999  | 4556011  | 0.01 | -0.33697 | 0       |
| chr19 | 10928327 | 10928696 | 0.37 | 0.29779  | 0       |
| chr19 | 11199222 | 11199476 | 0.25 | 0.29812  | 0.00021 |
| chr19 | 11784647 | 11784774 | 0.13 | 0.28159  | 0       |
| chr19 | 12624679 | 12624770 | 0.09 | 0.33546  | 0       |
| chr19 | 13108155 | 13108217 | 0.06 | 0.30876  | 0       |
| chr19 | 13113482 | 13113893 | 0.41 | 0.29695  | 0       |
| chr19 | 13365923 | 13366101 | 0.18 | -0.38503 | 0       |
| chr19 | 15160160 | 15160318 | 0.16 | -0.32411 | 0       |
| chr19 | 32082614 | 32082879 | 0.27 | -0.30981 | 0       |
| chr19 | 34174388 | 34174777 | 0.39 | -0.30619 | 0       |
| chr19 | 36642720 | 36643070 | 0.35 | 0.31257  | 0       |
| chr19 | 36643771 | 36643932 | 0.16 | 0.30998  | 0       |
| chr19 | 38524517 | 38524950 | 0.43 | -0.34851 | 0       |



|       |          |          |      |          |         |
|-------|----------|----------|------|----------|---------|
| chr19 | 50550284 | 50550492 | 0.21 | 0.3748   | 0       |
| chr19 | 51898727 | 51898904 | 0.18 | -0.32251 | 0       |
| chr19 | 52452317 | 52452528 | 0.21 | 0.34859  | 0       |
| chr19 | 54617570 | 54617654 | 0.08 | -0.26532 | 0.00064 |
| chr19 | 58220080 | 58220955 | 0.88 | 0.36748  | 0       |
| chr19 | 58341492 | 58341619 | 0.13 | 0.32237  | 0       |
| chr19 | 58715351 | 58716135 | 0.78 | 0.37221  | 0       |
| chr19 | 59092612 | 59092692 | 0.08 | 0.34232  | 0       |
| chr20 | 2308779  | 2308884  | 0.11 | -0.34482 | 0       |
| chr20 | 4906961  | 4906994  | 0.03 | 0.2998   | 0.00021 |
| chr20 | 6015349  | 6015708  | 0.36 | 0.42462  | 0       |
| chr20 | 7234895  | 7235067  | 0.17 | -0.31373 | 0       |
| chr20 | 11898478 | 11898557 | 0.08 | 0.30217  | 0       |
| chr20 | 16555142 | 16555226 | 0.08 | -0.34612 | 0       |
| chr20 | 17557158 | 17557271 | 0.11 | 0.33235  | 0       |
| chr20 | 17822792 | 17823154 | 0.36 | 0.32061  | 0       |
| chr20 | 20180211 | 20180469 | 0.26 | 0.30103  | 0.00021 |
| chr20 | 22541629 | 22541637 | 0.01 | 0.33238  | 0       |
| chr20 | 22542761 | 22542854 | 0.09 | 0.31474  | 0       |
| chr20 | 24929607 | 24929716 | 0.11 | -0.33189 | 0       |
| chr20 | 30639305 | 30639705 | 0.4  | 0.37577  | 0       |
| chr20 | 33567656 | 33567887 | 0.23 | 0.3223   | 0       |
| chr20 | 35924929 | 35925236 | 0.31 | 0.33094  | 0       |
| chr20 | 37202230 | 37202274 | 0.04 | 0.32745  | 0       |
| chr20 | 41597179 | 41597273 | 0.09 | -0.29546 | 0       |
| chr20 | 41691815 | 41691964 | 0.15 | -0.31148 | 0       |
| chr20 | 44116128 | 44116188 | 0.06 | 0.30355  | 0       |
| chr20 | 46342767 | 46342769 | 0    | 0.31823  | 0       |
| chr20 | 48551982 | 48551992 | 0.01 | -0.32078 | 0       |
| chr20 | 49737577 | 49738043 | 0.47 | 0.29648  | 0.00042 |
| chr20 | 52198225 | 52198378 | 0.15 | -0.30933 | 0       |
| chr20 | 55199493 | 55200370 | 0.88 | 0.34211  | 0       |
| chr20 | 56256274 | 56256437 | 0.16 | -0.30609 | 0       |
| chr20 | 56780599 | 56781279 | 0.68 | -0.33009 | 0       |
| chr20 | 58568926 | 58569157 | 0.23 | 0.32605  | 0       |
| chr20 | 59087484 | 59087752 | 0.27 | -0.32617 | 0       |
| chr20 | 59654126 | 59654147 | 0.02 | -0.37272 | 0       |
| chr20 | 59835988 | 59836416 | 0.43 | -0.31422 | 0       |
| chr20 | 59866503 | 59866704 | 0.2  | -0.35345 | 0       |
| chr20 | 59968939 | 59969413 | 0.47 | -0.38647 | 0       |
| chr20 | 59987301 | 59987416 | 0.12 | -0.30975 | 0       |
| chr20 | 60033929 | 60034285 | 0.36 | -0.35186 | 0       |
| chr20 | 60074136 | 60074520 | 0.38 | -0.3486  | 0       |
| chr20 | 60119508 | 60119551 | 0.04 | -0.47212 | 0       |
| chr20 | 60242113 | 60242590 | 0.48 | -0.30817 | 0       |
| chr20 | 60254244 | 60254704 | 0.46 | -0.3641  | 0       |
| chr20 | 60303394 | 60303881 | 0.49 | -0.30472 | 0.00021 |

|       |           |           |      |          |         |
|-------|-----------|-----------|------|----------|---------|
| chr20 | 60332183  | 60332244  | 0.06 | -0.34242 | 0       |
| chr20 | 60337213  | 60337350  | 0.14 | -0.32255 | 0       |
| chr20 | 60397766  | 60397915  | 0.15 | -0.31126 | 0       |
| chr20 | 60460170  | 60460568  | 0.4  | -0.30293 | 0       |
| chr20 | 60470081  | 60470267  | 0.19 | -0.33202 | 0       |
| chr20 | 62031739  | 62031924  | 0.19 | -0.38553 | 0       |
| chr20 | 62037718  | 62038206  | 0.49 | -0.26165 | 0.00085 |
| chr20 | 62052156  | 62052259  | 0.1  | -0.30051 | 0.00021 |
| chr20 | 62406677  | 62406721  | 0.04 | 0.36923  | 0       |
| chr21 | 16374422  | 16374706  | 0.28 | 0.27162  | 0.00085 |
| chr21 | 16774722  | 16774725  | 0    | 0.47249  | 0       |
| chr21 | 32128785  | 32128800  | 0.02 | -0.31539 | 0       |
| chr21 | 32185331  | 32185365  | 0.03 | -0.34564 | 0       |
| chr21 | 34185960  | 34186122  | 0.16 | 0.28331  | 0.00021 |
| chr21 | 38378189  | 38378406  | 0.22 | 0.31844  | 0       |
| chr21 | 38821784  | 38821804  | 0.02 | 0.29545  | 0.00064 |
| chr21 | 44161884  | 44162219  | 0.34 | 0.45631  | 0       |
| chr21 | 44582429  | 44582492  | 0.06 | -0.33985 | 0       |
| chr21 | 45713704  | 45713719  | 0.02 | -0.29571 | 0.00064 |
| chr21 | 46850665  | 46850840  | 0.18 | -0.29327 | 0       |
| chr21 | 48081242  | 48081257  | 0.02 | 0.3176   | 0       |
| chr22 | 18314772  | 18314866  | 0.09 | 0.31012  | 0       |
| chr22 | 22901946  | 22902237  | 0.29 | -0.35849 | 0       |
| chr22 | 29977677  | 29977742  | 0.07 | -0.34766 | 0       |
| chr22 | 31836032  | 31836042  | 0.01 | 0.29663  | 0.00042 |
| chr22 | 36278499  | 36278607  | 0.11 | 0.36227  | 0       |
| chr22 | 37960396  | 37960426  | 0.03 | 0.3202   | 0       |
| chr22 | 41904878  | 41905304  | 0.43 | 0.31648  | 0       |
| chr22 | 48027277  | 48027487  | 0.21 | -0.28435 | 0.00021 |
| chr22 | 48027726  | 48027730  | 0    | -0.29536 | 0.00064 |
| chrX  | 2882183   | 2882333   | 0.15 | 0.30536  | 0       |
| chrX  | 19082436  | 19082491  | 0.06 | -0.30668 | 0       |
| chrX  | 133680549 | 133680665 | 0.12 | 0.29896  | 0.00021 |
| chrX  | 145077291 | 145077477 | 0.19 | -0.29418 | 0       |
